# Supplementary material for: Understanding the nature and location of hydroxyl groups on hydrated titania nanoparticles
Source: Royal Society of Chemistry journal article supplement (doi:10.1039/d1nr00610j), 2021-01-01
Supplement: d1nr00610j1.pdf [file d1nr00610j1.pdf]

## **Understanding the Nature and Location of Hydroxyl Groups on Hydrated Titania Nanoparticles**

Lorenzo Mino,<sup>1\*</sup> Ángel Morales-García,<sup>2\*</sup> Stefan T. Bromley,<sup>2,3</sup> Francesc Illas<sup>2</sup>

1) *Department of Chemistry and NIS Centre, University of Torino, via Giuria 7, 10125 Torino, Italy*

2) *Departament de Ciència de Materials i Química Física & Institut de Química Teòrica i Computacional (IQTCUB), Universitat de Barcelona, c/ Martí i Franquès 1-11, 08028 Barcelona, Spain*

3) *Institució Catalana de Recerca i Estudis Avançats (ICREA), Passeig Lluís Companys 23, 08010 Barcelona, Spain*

\*Corresponding authors: [lorenzo.mino@unito.it](mailto:lorenzo.mino@unito.it), [angel.morales@ub.edu](mailto:angel.morales@ub.edu)

### **Contents**

(TiO<sub>2</sub>)<sub>12</sub>(H<sub>2</sub>O)<sub>5</sub> NP model (Fig. S1)

Scaled frequencies of surface hydroxyl groups (Table S1)

XYZ coordinates of the hydrated TiO<sub>2</sub> NPs

**Fig. S1** Structure of the  $(\text{TiO}_2)_{12}(\text{H}_2\text{O})_5$  nanocluster. The free hydroxyl (OH) groups are connected to Ti atoms which have tetrahedrally connectivity. Blue, white and red spheres correspond to Ti, H, and O atoms, respectively.

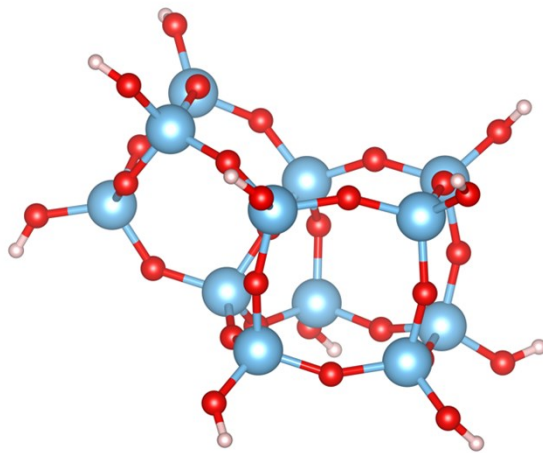

**Table S1.** Scaled frequencies of the Surface hydroxyl (OH) groups of (TiO<sub>2</sub>)<sub>35</sub>(H<sub>2</sub>O)<sub>13</sub>, (TiO<sub>2</sub>)<sub>35</sub>(H<sub>2</sub>O)<sub>30</sub>, (TiO<sub>2</sub>)<sub>84</sub>(H<sub>2</sub>O)<sub>24</sub>, and (TiO<sub>2</sub>)<sub>84</sub>(H<sub>2</sub>O)<sub>55</sub> NPs depicted in Fig. 4.

| (TiO <sub>2</sub> ) <sub>35</sub> (H <sub>2</sub> O) <sub>13</sub> |                                                  | (TiO <sub>2</sub> ) <sub>35</sub> (H <sub>2</sub> O) <sub>30</sub> |                                                  | (TiO <sub>2</sub> ) <sub>84</sub> (H <sub>2</sub> O) <sub>24</sub> |                                                  | (TiO <sub>2</sub> ) <sub>84</sub> (H <sub>2</sub> O) <sub>55</sub> |                                                  |
|--------------------------------------------------------------------|--------------------------------------------------|--------------------------------------------------------------------|--------------------------------------------------|--------------------------------------------------------------------|--------------------------------------------------|--------------------------------------------------------------------|--------------------------------------------------|
| Frequency [cm <sup>-1</sup> ]                                      | IR-intensity [D <sup>2</sup> /Ang <sup>2</sup> ] | Frequency [cm <sup>-1</sup> ]                                      | IR-intensity [D <sup>2</sup> /Ang <sup>2</sup> ] | Frequency [cm <sup>-1</sup> ]                                      | IR-intensity [D <sup>2</sup> /Ang <sup>2</sup> ] | Frequency [cm <sup>-1</sup> ]                                      | IR-intensity [D <sup>2</sup> /Ang <sup>2</sup> ] |
| 3273.719853                                                        | 8.47817435                                       | 3134.465326                                                        | 0.1981586                                        | 3391.350814                                                        | 12.46771675                                      | 2976.080864                                                        | 6.93119631                                       |
| 3342.290937                                                        | 7.33863892                                       | 3160.750529                                                        | 0.19982033                                       | 3392.2084                                                          | 3.34479275                                       | 3011.839065                                                        | 30.52950462                                      |
| 3516.744953                                                        | 5.64928855                                       | 3222.364748                                                        | 0.20371554                                       | 3399.370298                                                        | 8.71287063                                       | 3064.485254                                                        | 14.85536893                                      |
| 3568.066769                                                        | 1.44598861                                       | 3225.252016                                                        | 0.20389807                                       | 3497.442559                                                        | 8.35909835                                       | 3095.896681                                                        | 25.79350945                                      |
| 3656.022293                                                        | 1.67386109                                       | 3298.635436                                                        | 0.20853731                                       | 3541.416498                                                        | 3.32320996                                       | 3112.951602                                                        | 7.09219149                                       |
| 3656.271975                                                        | 3.07015818                                       | 3302.002496                                                        | 0.20875018                                       | 3556.782872                                                        | 2.27987107                                       | 3155.061565                                                        | 6.69589247                                       |
| 3659.351184                                                        | 2.07874484                                       | 3323.902461                                                        | 0.21013468                                       | 3572.580995                                                        | 8.4993366                                        | 3157.967958                                                        | 20.89539066                                      |
| 3667.979646                                                        | 3.55359557                                       | 3347.242533                                                        | 0.21161022                                       | 3575.829569                                                        | 6.1586022                                        | 3172.891632                                                        | 7.22479772                                       |
| 3672.817554                                                        | 5.37029784                                       | 3363.004171                                                        | 0.21260666                                       | 3579.392194                                                        | 2.10232386                                       | 3176.951271                                                        | 9.2190924                                        |
| 3673.229611                                                        | 1.73391292                                       | 3416.186276                                                        | 0.21596879                                       | 3580.275001                                                        | 2.92886571                                       | 3196.598504                                                        | 6.26769125                                       |
| 3673.412608                                                        | 5.42084693                                       | 3518.910796                                                        | 0.22246296                                       | 3584.916383                                                        | 1.80272158                                       | 3205.175879                                                        | 9.2989558                                        |
| 3675.293584                                                        | 4.2496583                                        | 3528.122964                                                        | 0.22304535                                       | 3600.476478                                                        | 4.05803219                                       | 3244.817336                                                        | 11.69493209                                      |
| 3675.894581                                                        | 2.56113013                                       | 3540.006857                                                        | 0.22379664                                       | 3616.587754                                                        | 2.56620016                                       | 3249.134721                                                        | 7.7474787                                        |
| 3679.970923                                                        | 3.21877801                                       | 3560.267923                                                        | 0.22507753                                       | 3632.130897                                                        | 7.6664249                                        | 3254.551101                                                        | 4.57227853                                       |
| 3681.373223                                                        | 4.59774363                                       | 3560.983378                                                        | 0.22512276                                       | 3632.570646                                                        | 1.33897586                                       | 3275.991584                                                        | 11.2623157                                       |
| 3682.792379                                                        | 3.53269879                                       | 3572.369875                                                        | 0.2258426                                        | 3647.591862                                                        | 1.46805653                                       | 3292.329032                                                        | 9.91751432                                       |
| 3683.854112                                                        | 4.27901337                                       | 3574.791666                                                        | 0.22599571                                       | 3649.383373                                                        | 2.66944216                                       | 3317.711344                                                        | 7.50532996                                       |
| 3684.290856                                                        | 5.34886793                                       | 3587.590895                                                        | 0.22680486                                       | 3649.981347                                                        | 2.07983572                                       | 3372.664449                                                        | 3.82440443                                       |
| 3685.209449                                                        | 4.22212271                                       | 3594.220659                                                        | 0.22722399                                       | 3660.619596                                                        | 1.35115148                                       | 3398.912685                                                        | 3.90929948                                       |
| 3688.165703                                                        | 3.8868558                                        | 3602.477498                                                        | 0.22774598                                       | 3661.34083                                                         | 4.13901673                                       | 3401.394684                                                        | 3.23139263                                       |
| 3689.931815                                                        | 3.4694389                                        | 3602.56022                                                         | 0.22775121                                       | 3661.439395                                                        | 3.96619476                                       | 3401.701494                                                        | 7.23041525                                       |
| 3692.032137                                                        | 3.23673734                                       | 3619.321788                                                        | 0.22881087                                       | 3664.023394                                                        | 1.71277316                                       | 3408.524021                                                        | 8.50689897                                       |
| 3695.891003                                                        | 1.36794823                                       | 3631.564126                                                        | 0.22958482                                       | 3665.499959                                                        | 4.50263781                                       | 3410.52909                                                         | 1.58288007                                       |
| 3696.937408                                                        | 7.8643059                                        | 3634.52058                                                         | 0.22977173                                       | 3665.822619                                                        | 1.13889176                                       | 3473.039323                                                        | 6.65303349                                       |
| 3706.794151                                                        | 5.80068328                                       | 3637.508782                                                        | 0.22996064                                       | 3668.441578                                                        | 1.2962612                                        | 3474.04422                                                         | 4.37062163                                       |
| 3707.804306                                                        | 3.64038177                                       | 3645.737768                                                        | 0.23048087                                       | 3669.235074                                                        | 2.63528974                                       | 3483.200116                                                        | 2.39407691                                       |
|                                                                    |                                                  | 3650.091314                                                        | 0.2307561                                        | 3672.753762                                                        | 4.47689407                                       | 3510.506685                                                        | 3.53763437                                       |
|                                                                    |                                                  | 3651.849395                                                        | 0.23086724                                       | 3674.203145                                                        | 3.57055157                                       | 3532.089203                                                        | 2.63699024                                       |
|                                                                    |                                                  | 3652.347535                                                        | 0.23089873                                       | 3674.504831                                                        | 7.97162277                                       | 3540.171321                                                        | 1.39759971                                       |
|                                                                    |                                                  | 3652.474284                                                        | 0.23090675                                       | 3674.683012                                                        | 0.39637594                                       | 3557.340354                                                        | 5.07449742                                       |
|                                                                    |                                                  | 3661.676249                                                        | 0.23148849                                       | 3675.691914                                                        | 2.78992553                                       | 3559.243934                                                        | 1.83382691                                       |
|                                                                    |                                                  | 3662.906785                                                        | 0.23156628                                       | 3676.702232                                                        | 0.42759676                                       | 3560.994651                                                        | 0.97040903                                       |
|                                                                    |                                                  | 3666.908014                                                        | 0.23181923                                       | 3677.505057                                                        | 0.29240412                                       | 3569.383027                                                        | 1.62220039                                       |
|                                                                    |                                                  | 3668.503213                                                        | 0.23192008                                       | 3677.563685                                                        | 5.99733611                                       | 3572.756756                                                        | 1.22296094                                       |
|                                                                    |                                                  | 3669.641641                                                        | 0.23199205                                       | 3677.714741                                                        | 2.89753743                                       | 3578.857576                                                        | 1.27167863                                       |
|                                                                    |                                                  | 3672.781206                                                        | 0.23219053                                       | 3678.15498                                                         | 11.91913519                                      | 3583.484774                                                        | 1.78658006                                       |
|                                                                    |                                                  | 3673.151741                                                        | 0.23221396                                       | 3680.858212                                                        | 3.65426528                                       | 3591.785                                                           | 1.50858977                                       |
|                                                                    |                                                  | 3673.955867                                                        | 0.2322648                                        | 3683.036484                                                        | 4.70073044                                       | 3595.34564                                                         | 2.3072054                                        |
|                                                                    |                                                  | 3675.590737                                                        | 0.23236815                                       | 3684.121508                                                        | 5.0943139                                        | 3596.328125                                                        | 1.26904105                                       |
|                                                                    |                                                  | 3680.12077                                                         | 0.23265494                                       | 3686.153855                                                        | 4.30262144                                       | 3603.082821                                                        | 1.20693009                                       |
|                                                                    |                                                  | 3682.216023                                                        | 0.232787                                         | 3689.896829                                                        | 5.5766396                                        | 3604.537979                                                        | 1.49476621                                       |
|                                                                    |                                                  | 3682.768433                                                        | 0.23282192                                       | 3690.430825                                                        | 2.71444857                                       | 3605.023711                                                        | 3.25651556                                       |
|                                                                    |                                                  | 3684.006331                                                        | 0.23290018                                       | 3695.731354                                                        | 3.18863681                                       | 3609.599151                                                        | 1.31917969                                       |
|                                                                    |                                                  | 3686.512676                                                        | 0.23305863                                       | 3704.303112                                                        | 4.20029555                                       | 3612.045391                                                        | 0.72750937                                       |
|                                                                    |                                                  | 3689.362005                                                        | 0.23323876                                       | 3705.144872                                                        | 5.21029855                                       | 3623.881475                                                        | 1.70979103                                       |
|                                                                    |                                                  | 3689.540491                                                        | 0.23325004                                       | 3706.100574                                                        | 5.92412743                                       | 3628.82928                                                         | 2.65418673                                       |
|                                                                    |                                                  | 3689.815488                                                        | 0.23326743                                       | 3717.484613                                                        | 17.12866833                                      | 3631.977013                                                        | 4.66272313                                       |
|                                                                    |                                                  | 3691.848269                                                        | 0.23339594                                       | 3717.797244                                                        | 0.75732741                                       | 3632.109758                                                        | 2.10427605                                       |
|                                                                    |                                                  | 3694.105224                                                        | 0.23353862                                       |                                                                    |                                                  | 3632.498341                                                        | 1.40018807                                       |
|                                                                    |                                                  | 3695.721045                                                        | 0.23364077                                       |                                                                    |                                                  | 3636.167142                                                        | 2.48397622                                       |
|                                                                    |                                                  | 3696.363365                                                        | 0.23368138                                       |                                                                    |                                                  | 3637.150614                                                        | 1.87181438                                       |
|                                                                    |                                                  | 3697.260846                                                        | 0.23373812                                       |                                                                    |                                                  | 3640.262911                                                        | 1.09977268                                       |
|                                                                    |                                                  | 3698.067853                                                        | 0.23378914                                       |                                                                    |                                                  | 3648.138258                                                        | 3.65468937                                       |
|                                                                    |                                                  | 3699.029283                                                        | 0.23384992                                       |                                                                    |                                                  | 3650.004535                                                        | 2.02884587                                       |
|                                                                    |                                                  | 3700.376455                                                        | 0.23393509                                       |                                                                    |                                                  | 3651.427548                                                        | 1.66404245                                       |
|                                                                    |                                                  | 3701.802335                                                        | 0.23402523                                       |                                                                    |                                                  | 3652.092195                                                        | 1.00945957                                       |
|                                                                    |                                                  | 3705.658211                                                        | 0.23426899                                       |                                                                    |                                                  | 3652.196992                                                        | 2.92793396                                       |
|                                                                    |                                                  | 3713.022121                                                        | 0.23473453                                       |                                                                    |                                                  | 3653.425497                                                        | 1.45426423                                       |
|                                                                    |                                                  | 3714.951149                                                        | 0.23485649                                       |                                                                    |                                                  | 3653.951154                                                        | 0.27694952                                       |
|                                                                    |                                                  | 3728.654302                                                        | 0.23572279                                       |                                                                    |                                                  | 3655.05407                                                         | 4.01561864                                       |
|                                                                    |                                                  |                                                                    |                                                  |                                                                    |                                                  | 3655.87012                                                         | 1.73110767                                       |
|                                                                    |                                                  |                                                                    |                                                  |                                                                    |                                                  | 3656.149688                                                        | 3.25796908                                       |
|                                                                    |                                                  |                                                                    |                                                  |                                                                    |                                                  | 3656.83058                                                         | 3.16281198                                       |
|                                                                    |                                                  |                                                                    |                                                  |                                                                    |                                                  | 3658.062224                                                        | 0.90987688                                       |
|                                                                    |                                                  |                                                                    |                                                  |                                                                    |                                                  | 3661.051398                                                        | 0.22487892                                       |
|                                                                    |                                                  |                                                                    |                                                  |                                                                    |                                                  | 3661.711454                                                        | 2.46073462                                       |
|                                                                    |                                                  |                                                                    |                                                  |                                                                    |                                                  | 3663.824999                                                        | 5.3442251                                        |
|                                                                    |                                                  |                                                                    |                                                  |                                                                    |                                                  | 3664.358485                                                        | 3.16719953                                       |
|                                                                    |                                                  |                                                                    |                                                  |                                                                    |                                                  | 3665.39885                                                         | 1.97256619                                       |
|                                                                    |                                                  |                                                                    |                                                  |                                                                    |                                                  | 3667.156411                                                        | 4.81134848                                       |
|                                                                    |                                                  |                                                                    |                                                  |                                                                    |                                                  | 3667.26117                                                         | 0.07313749                                       |
|                                                                    |                                                  |                                                                    |                                                  |                                                                    |                                                  | 3668.351599                                                        | 3.35700308                                       |
|                                                                    |                                                  |                                                                    |                                                  |                                                                    |                                                  | 3668.763368                                                        | 2.3913026                                        |
|                                                                    |                                                  |                                                                    |                                                  |                                                                    |                                                  | 3668.802963                                                        | 0.33004299                                       |
|                                                                    |                                                  |                                                                    |                                                  |                                                                    |                                                  | 3669.649416                                                        | 6.8359256                                        |
|                                                                    |                                                  |                                                                    |                                                  |                                                                    |                                                  | 3670.465594                                                        | 1.88306523                                       |
|                                                                    |                                                  |                                                                    |                                                  |                                                                    |                                                  | 3671.412592                                                        | 0.63639745                                       |
|                                                                    |                                                  |                                                                    |                                                  |                                                                    |                                                  | 3671.444599                                                        | 2.51333797                                       |
|                                                                    |                                                  |                                                                    |                                                  |                                                                    |                                                  | 3671.842988                                                        | 2.69944006                                       |
|                                                                    |                                                  |                                                                    |                                                  |                                                                    |                                                  | 3673.834838                                                        | 2.6496095                                        |
|                                                                    |                                                  |                                                                    |                                                  |                                                                    |                                                  | 3674.112                                                           | 5.20939694                                       |
|                                                                    |                                                  |                                                                    |                                                  |                                                                    |                                                  | 3674.72968                                                         | 2.70076482                                       |
|                                                                    |                                                  |                                                                    |                                                  |                                                                    |                                                  | 3675.162842                                                        | 5.82048444                                       |
|                                                                    |                                                  |                                                                    |                                                  |                                                                    |                                                  | 3675.563012                                                        | 1.88432756                                       |
|                                                                    |                                                  |                                                                    |                                                  |                                                                    |                                                  | 3677.19185                                                         | 5.71934502                                       |
|                                                                    |                                                  |                                                                    |                                                  |                                                                    |                                                  | 3677.678324                                                        | 2.80652071                                       |
|                                                                    |                                                  |                                                                    |                                                  |                                                                    |                                                  | 3677.914652                                                        | 3.04955018                                       |
|                                                                    |                                                  |                                                                    |                                                  |                                                                    |                                                  | 3679.213722                                                        | 0.78225566                                       |
|                                                                    |                                                  |                                                                    |                                                  |                                                                    |                                                  | 3680.083818                                                        | 2.16214185                                       |
|                                                                    |                                                  |                                                                    |                                                  |                                                                    |                                                  | 3680.672101                                                        | 4.79337405                                       |
|                                                                    |                                                  |                                                                    |                                                  |                                                                    |                                                  | 3681.48301                                                         | 4.35934737                                       |
|                                                                    |                                                  |                                                                    |                                                  |                                                                    |                                                  | 3683.095144                                                        | 3.85825295                                       |
|                                                                    |                                                  |                                                                    |                                                  |                                                                    |                                                  | 3683.855221                                                        | 3.9455797                                        |
|                                                                    |                                                  |                                                                    |                                                  |                                                                    |                                                  | 3684.432472                                                        | 3.92014269                                       |
|                                                                    |                                                  |                                                                    |                                                  |                                                                    |                                                  | 3686.122496                                                        | 3.84218293                                       |
|                                                                    |                                                  |                                                                    |                                                  |                                                                    |                                                  | 3686.477466                                                        | 2.70490607                                       |
|                                                                    |                                                  |                                                                    |                                                  |                                                                    |                                                  | 3686.90383                                                         | 0.26350357                                       |
|                                                                    |                                                  |                                                                    |                                                  |                                                                    |                                                  | 3688.093003                                                        | 3.23339372                                       |
|                                                                    |                                                  |                                                                    |                                                  |                                                                    |                                                  | 3689.671902                                                        | 1.14068277                                       |
|                                                                    |                                                  |                                                                    |                                                  |                                                                    |                                                  | 3690.11612                                                         | 7.8064214                                        |
|                                                                    |                                                  |                                                                    |                                                  |                                                                    |                                                  | 3692.988172                                                        | 3.62638061                                       |
|                                                                    |                                                  |                                                                    |                                                  |                                                                    |                                                  | 3693.268974                                                        | 4.15523731                                       |
|                                                                    |                                                  |                                                                    |                                                  |                                                                    |                                                  | 3695.14384                                                         | 3.42489693                                       |
|                                                                    |                                                  |                                                                    |                                                  |                                                                    |                                                  | 3695.792328                                                        | 3.65258788                                       |
|                                                                    |                                                  |                                                                    |                                                  |                                                                    |                                                  | 3695.997824                                                        | 4.62580127                                       |
|                                                                    |                                                  |                                                                    |                                                  |                                                                    |                                                  | 3697.997463                                                        | 4.84945654                                       |
|                                                                    |                                                  |                                                                    |                                                  |                                                                    |                                                  | 3701.301893                                                        | 1.10175011                                       |
|                                                                    |                                                  |                                                                    |                                                  |                                                                    |                                                  | 3702.320063                                                        | 7.60832739                                       |
|                                                                    |                                                  |                                                                    |                                                  |                                                                    |                                                  | 3716.335778                                                        | 8.0530576                                        |
|                                                                    |                                                  |                                                                    |                                                  |                                                                    |                                                  | 3716.69939                                                         | 7.18945285                                       |

XYZ files of TiO<sub>2</sub> NPs(TiO<sub>2</sub>)<sub>12</sub>(H<sub>2</sub>O)<sub>5</sub>

51

PBE xc

|    |             |             |             |
|----|-------------|-------------|-------------|
| H  | -1.17742654 | -4.53806909 | -5.72575897 |
| O  | -0.69329209 | -4.54842491 | 3.80343812  |
| H  | -6.39649210 | -3.48071486 | -3.45463221 |
| H  | 1.71519733  | -6.68527617 | -1.60805749 |
| O  | -2.36918347 | -3.00204372 | 1.85430685  |
| H  | -0.39566494 | -5.46547885 | 3.90987716  |
| H  | 2.57274497  | 0.45813675  | 4.15300422  |
| O  | -4.15334679 | -0.65055193 | -2.29093023 |
| H  | 1.04177399  | 0.95929271  | -5.24692456 |
| H  | -6.31762935 | 0.11537811  | 4.75014264  |
| O  | -4.54700277 | -0.95886114 | 2.23747323  |
| H  | 4.75043523  | -0.68757259 | -0.63254719 |
| H  | -1.34869832 | 3.88425019  | 4.69808792  |
| O  | -2.84999668 | 1.03447966  | 3.59314090  |
| H  | -5.22295591 | 4.89613237  | 0.03050508  |
| Ti | -0.66440349 | -3.50556850 | 2.31501623  |
| Ti | -4.54292386 | -2.43052510 | -2.04480955 |
| Ti | 0.81172130  | -4.46587542 | -0.75305836 |
| Ti | -1.46429986 | 2.02881731  | 2.95515719  |
| Ti | -4.55284533 | 0.68224709  | 3.00073154  |
| Ti | -1.47186233 | -3.64506094 | -3.36951589 |
| Ti | -3.75314144 | 2.90372213  | 0.65464359  |
| Ti | 2.29761852  | -1.22924985 | -1.00043646 |
| Ti | 1.11789878  | -0.40126614 | 2.26605597  |
| Ti | -2.91062953 | 0.35418504  | -1.41643460 |
| Ti | -3.49976101 | -1.86266013 | 1.02427098  |
| Ti | -0.12186000 | -0.35299984 | -3.41202880 |
| O  | -3.20048456 | -3.37691594 | -2.80289352 |
| O  | -3.56048226 | 1.97962785  | -0.91182412 |
| O  | -2.53856088 | -0.59518038 | 0.11302857  |
| O  | 1.78249461  | -5.99203120 | -0.93305563 |
| O  | -4.88858433 | 1.93206416  | 1.69814701  |
| O  | -6.16069600 | -2.85811699 | -2.74966732 |
| O  | -0.49153035 | -4.38587863 | -2.00597695 |
| O  | 0.21588697  | 0.53968130  | -4.95845668 |
| O  | 0.06297934  | -4.39594342 | 0.92257860  |
| O  | -0.87201976 | 3.17981730  | 4.23176892  |
| O  | 1.88065515  | -3.00306562 | -0.94000202 |
| O  | -0.75026640 | -2.05254617 | -3.78196874 |
| O  | 1.36495962  | -0.49255953 | -2.41352040 |
| O  | -1.44979019 | -4.74507609 | -4.81779930 |
| O  | -4.37119858 | 4.59051442  | 0.37945626  |
| O  | 4.08176328  | -1.00276702 | -1.26093746 |
| O  | -1.41303873 | 0.49350840  | -2.43880109 |
| O  | 0.30432104  | -1.98883123 | 2.61656910  |
| O  | -5.76411199 | 0.80415567  | 4.35017491  |
| O  | -2.14419063 | 2.94247360  | 1.52761023  |
| O  | -4.50516676 | -2.71774181 | -0.22969041 |
| O  | 2.51097277  | -0.16125688 | 3.40850218  |
| O  | -0.06937148 | 0.94795865  | 2.46286205  |
| O  | 1.78071078  | -0.47001658 | 0.54721145  |

**(TiO<sub>2</sub>)<sub>35</sub>(H<sub>2</sub>O)<sub>13</sub>**

144

PBE xc

|    |             |             |             |
|----|-------------|-------------|-------------|
| O  | 20.16903542 | 18.68735227 | 38.03927740 |
| Ti | 16.88762869 | 17.00296094 | 43.80097235 |
| Ti | 16.92006277 | 15.27915896 | 46.19565241 |
| O  | 16.97173116 | 17.06714711 | 46.10199349 |
| O  | 16.91993370 | 14.95201251 | 48.33556715 |
| O  | 16.57990477 | 15.24801527 | 44.39690258 |
| O  | 16.80764953 | 16.87691795 | 42.02023121 |
| O  | 15.08073607 | 14.91434773 | 46.76348496 |
| Ti | 20.47065849 | 16.85019768 | 43.67947517 |
| Ti | 18.60050779 | 17.17127227 | 41.38059218 |
| Ti | 20.65465619 | 15.24360288 | 46.07142955 |
| O  | 20.55046030 | 17.00336839 | 45.90239641 |
| O  | 18.67905292 | 17.18540303 | 43.71498204 |
| O  | 20.65511702 | 14.74556686 | 48.20958485 |
| O  | 20.70715620 | 15.09767464 | 44.23616936 |
| O  | 18.52104038 | 16.89975260 | 39.59074275 |
| O  | 20.38429053 | 16.72491302 | 41.88338279 |
| O  | 18.73214981 | 14.78538889 | 46.53901285 |
| O  | 22.46988259 | 15.08536308 | 46.48942159 |
| Ti | 17.19008984 | 20.73889301 | 43.79087066 |
| Ti | 16.76120264 | 18.93806522 | 46.27599091 |
| O  | 17.11190694 | 20.78773602 | 45.93236662 |
| O  | 16.97782972 | 18.97181903 | 48.35326639 |
| O  | 16.52277099 | 18.90128492 | 44.29739592 |
| O  | 16.86488548 | 20.87198486 | 41.99804920 |
| O  | 15.00966003 | 19.04112879 | 46.81084052 |
| Ti | 18.61502337 | 18.66677080 | 38.98945346 |
| Ti | 21.06859338 | 20.59087781 | 43.64267962 |
| Ti | 18.60506034 | 20.99222248 | 41.38345218 |
| Ti | 20.80462833 | 18.94624420 | 46.11092606 |
| O  | 18.66050853 | 18.92437683 | 41.00810844 |
| O  | 20.78757909 | 20.73453188 | 45.57321268 |
| O  | 18.91983298 | 20.59219468 | 43.39175865 |
| O  | 20.83049516 | 18.83581837 | 48.15291880 |
| O  | 21.06006433 | 18.69893677 | 44.08764552 |
| O  | 18.64771842 | 20.71164888 | 39.41666650 |
| O  | 20.66101970 | 20.80739062 | 41.70967873 |
| O  | 18.87165047 | 18.95487463 | 46.59596161 |
| O  | 22.71083395 | 18.89853568 | 46.53669845 |
| Ti | 17.14763438 | 22.58911715 | 46.02285547 |
| O  | 17.21018077 | 23.00663089 | 48.17648570 |
| O  | 16.95674480 | 22.59915611 | 44.23030259 |
| O  | 15.33586103 | 23.01825984 | 46.58810475 |
| Ti | 20.87021205 | 22.87775536 | 46.00449192 |
| O  | 20.91827944 | 22.83565730 | 47.97347738 |
| O  | 20.92794366 | 22.58723338 | 44.00234659 |
| O  | 18.98212703 | 22.96115644 | 46.35548521 |
| O  | 22.83335589 | 22.31994011 | 46.41906490 |
| Ti | 15.07001019 | 15.35845946 | 48.88866018 |
| Ti | 17.24159032 | 17.29194712 | 53.47047897 |
| Ti | 15.39855999 | 17.19988307 | 51.18080475 |
| O  | 15.20898008 | 15.39925212 | 50.70072316 |
| O  | 17.22318478 | 17.32973237 | 55.25833751 |
| O  | 15.43756841 | 17.09376716 | 53.00392175 |

|    |             |             |             |
|----|-------------|-------------|-------------|
| O  | 14.77264028 | 17.20094209 | 48.97708836 |
| O  | 17.18496616 | 17.28827631 | 51.19277029 |
| Ti | 18.79396488 | 15.17625526 | 48.63098389 |
| Ti | 20.97491562 | 17.31727367 | 53.25315243 |
| Ti | 19.00418634 | 16.90715928 | 50.88653811 |
| O  | 18.91088767 | 15.10246236 | 50.45588014 |
| O  | 21.20712467 | 17.13586378 | 55.05603132 |
| O  | 19.08223506 | 16.75735631 | 52.87904436 |
| O  | 18.89327296 | 16.96852780 | 48.79634720 |
| O  | 20.89045417 | 17.13032332 | 51.09894593 |
| Ti | 22.51515922 | 15.05018229 | 48.30067878 |
| Ti | 22.67680050 | 16.97503419 | 50.91983187 |
| O  | 22.93516341 | 15.11382452 | 50.44372820 |
| O  | 22.77102403 | 16.88430796 | 52.71965789 |
| O  | 22.88117080 | 16.90226476 | 48.74635987 |
| Ti | 15.19987760 | 19.05505837 | 48.65687272 |
| Ti | 17.32454606 | 20.86879119 | 53.37030949 |
| Ti | 15.57998562 | 20.97132633 | 51.07469297 |
| Ti | 17.67462462 | 19.13556437 | 55.75390241 |
| O  | 14.97919061 | 19.08184996 | 50.70301411 |
| O  | 17.29041226 | 20.91297507 | 55.16986771 |
| O  | 15.54816524 | 21.15027677 | 52.90154851 |
| O  | 17.52177591 | 19.18701981 | 57.56103601 |
| O  | 17.58145413 | 19.06857392 | 53.45430247 |
| O  | 14.93396668 | 20.94037927 | 48.94942289 |
| O  | 17.33607148 | 20.75718236 | 51.15207204 |
| Ti | 18.92898620 | 18.89973964 | 48.50865799 |
| Ti | 21.09039150 | 21.20254079 | 53.07290006 |
| Ti | 19.27133905 | 20.89786501 | 50.79591125 |
| Ti | 21.47454865 | 18.91073036 | 55.50601470 |
| O  | 19.11773346 | 18.93680850 | 50.41131776 |
| O  | 21.39324655 | 20.95421014 | 55.02744368 |
| O  | 19.18288736 | 21.32204411 | 52.81573473 |
| O  | 21.33697123 | 19.12182120 | 57.47986347 |
| O  | 20.97680193 | 19.08141362 | 53.51579501 |
| O  | 19.03714253 | 20.82492311 | 48.75733078 |
| O  | 21.07542624 | 20.71856847 | 51.21858867 |
| O  | 19.45000906 | 19.11946806 | 56.00993086 |
| Ti | 22.63100005 | 18.78865600 | 48.32509542 |
| Ti | 23.29824827 | 20.61809553 | 50.67570738 |
| O  | 23.24307819 | 18.73355628 | 50.45956961 |
| O  | 23.06681042 | 20.87407761 | 52.66101894 |
| O  | 22.91833939 | 20.63820299 | 48.79515383 |
| Ti | 15.37597672 | 22.77535836 | 48.76485716 |
| O  | 15.52838886 | 22.78198240 | 50.56349198 |
| Ti | 19.07230303 | 22.61851474 | 48.51960021 |
| O  | 19.25756773 | 22.76050774 | 50.29867461 |
| Ti | 22.91791383 | 22.79508225 | 48.39035610 |
| O  | 22.83857991 | 22.64155158 | 50.32465149 |
| Ti | 19.32568402 | 19.21808752 | 58.04065964 |
| O  | 19.40287025 | 17.84378855 | 59.23397381 |
| H  | 18.89153262 | 17.01988090 | 59.17418256 |
| O  | 19.48703302 | 20.82133505 | 58.89066836 |
| H  | 18.71536782 | 21.35032905 | 59.15549335 |
| H  | 20.64435204 | 17.87479267 | 37.79587109 |
| O  | 17.17619285 | 18.74425894 | 37.87509970 |
| H  | 16.32725969 | 18.29392617 | 38.01756825 |

|   |             |             |             |
|---|-------------|-------------|-------------|
| O | 24.79542768 | 22.70069177 | 48.35923023 |
| H | 25.27139183 | 22.61966928 | 47.51548636 |
| H | 22.32686006 | 23.11319353 | 51.01376988 |
| O | 23.61079836 | 13.56250801 | 48.43062382 |
| H | 23.77179054 | 13.08935980 | 47.59513509 |
| H | 22.99623940 | 14.35397078 | 51.04413475 |
| O | 13.54591672 | 14.31845255 | 48.83280822 |
| H | 13.09722718 | 14.17784241 | 49.68533760 |
| H | 14.31101307 | 14.88992467 | 46.17234646 |
| H | 14.55188880 | 23.04625771 | 46.01682900 |
| O | 13.98964936 | 23.99299773 | 48.66708692 |
| H | 13.59140569 | 24.24734364 | 49.51834519 |
| H | 22.08511269 | 18.98520030 | 58.08345359 |
| O | 23.30745742 | 18.88380396 | 55.49376899 |
| H | 23.76571417 | 18.09691636 | 55.14574319 |
| O | 21.33516484 | 23.03597814 | 52.97484827 |
| H | 20.53808409 | 23.57902505 | 52.83172018 |
| H | 21.55127599 | 21.66732479 | 55.66728144 |
| H | 23.78034549 | 20.94158413 | 53.31674332 |
| O | 25.06136068 | 20.96692956 | 50.59652092 |
| H | 25.30902176 | 21.61709373 | 49.89033407 |
| O | 18.68427817 | 22.81643931 | 41.27656458 |
| H | 17.97626797 | 23.34759036 | 41.68555849 |
| H | 18.50619498 | 21.42453594 | 38.77278684 |
| H | 21.34307908 | 20.85797958 | 41.02025679 |
| O | 22.87745733 | 20.61344611 | 43.39734071 |
| H | 23.41518329 | 19.81724070 | 43.55219411 |
| O | 21.32621404 | 24.60914276 | 45.84152563 |
| H | 21.87501151 | 24.94467942 | 46.59978051 |
| H | 21.07060914 | 23.28358956 | 43.34019727 |
| O | 22.84928443 | 24.65415010 | 48.15457940 |
| H | 23.71058779 | 25.10319474 | 48.22374809 |
| H | 22.97744719 | 21.37400549 | 46.21624476 |

**(TiO<sub>2</sub>)<sub>35</sub>(H<sub>2</sub>O)<sub>30</sub>**

195

PBE xc

|    |             |             |             |
|----|-------------|-------------|-------------|
| O  | -9.70640156 | -3.77194615 | 0.71595160  |
| Ti | -4.74733315 | 1.13755116  | 2.23342542  |
| Ti | -2.33353092 | 0.95633593  | 4.33353257  |
| O  | -2.88812616 | 1.12350612  | 2.12500229  |
| O  | -0.49021231 | 1.34744550  | 4.03224332  |
| O  | -4.42843135 | 0.91588769  | 4.26587183  |
| O  | -6.90887546 | 0.95515667  | 1.99947108  |
| O  | -2.42220780 | 3.04643748  | 4.04930842  |
| Ti | -4.38426138 | -2.79588415 | 1.83625709  |
| Ti | -6.97420081 | -1.03166116 | 2.45386690  |
| Ti | -1.75174564 | -2.68265790 | 3.69894045  |
| O  | -2.40024315 | -2.51768410 | 1.81318165  |
| O  | -5.13769598 | -0.83844546 | 2.21412774  |
| O  | 0.12888940  | -2.28885314 | 3.71327551  |
| O  | -3.80080030 | -3.06041470 | 3.72468721  |
| O  | -8.92990763 | -1.72464316 | 2.57019844  |
| O  | -6.30910168 | -2.93592265 | 2.49184127  |
| O  | -1.87491123 | -0.80897905 | 4.02557140  |
| O  | -1.04426506 | -4.49264358 | 2.98972346  |
| Ti | -5.14163140 | 1.36826214  | -1.54793857 |

|    |             |             |             |
|----|-------------|-------------|-------------|
| Ti | -2.65800810 | 1.53973408  | 0.25443697  |
| O  | -3.22380940 | 1.50275929  | -1.65027958 |
| O  | -0.58651741 | 1.81036587  | 0.17507318  |
| O  | -4.62923374 | 1.38735577  | 0.36609066  |
| O  | -7.14795624 | 0.98966576  | -0.78489480 |
| O  | -2.46099721 | 3.42190060  | 0.33803812  |
| Ti | -9.47265129 | -1.96057878 | 0.66359520  |
| Ti | -4.50737783 | -2.42539405 | -1.78688376 |
| Ti | -7.29950108 | -0.86497398 | -1.39840035 |
| Ti | -2.05882843 | -2.23874962 | -0.08769443 |
| O  | -7.68736062 | -1.27441077 | 0.53768304  |
| O  | -2.62875933 | -2.20001792 | -1.95258187 |
| O  | -5.44568514 | -0.55974855 | -1.79380913 |
| O  | -0.02737343 | -1.88787369 | -0.26242248 |
| O  | -4.07779314 | -2.14088166 | 0.04945897  |
| O  | -9.19523493 | -1.80626419 | -1.29400475 |
| O  | -6.51197443 | -2.71590899 | -1.71137124 |
| O  | -1.88717911 | -0.29737063 | 0.01383678  |
| O  | -1.25656685 | -4.01642277 | -0.24741147 |
| Ti | -2.75948161 | 1.77096214  | -3.62146057 |
| O  | -0.87238863 | 2.05749891  | -3.76566897 |
| O  | -4.89721044 | 1.56101878  | -3.55769177 |
| O  | -2.68515623 | 3.75863039  | -3.02666754 |
| Ti | -2.27910825 | -1.90728393 | -4.04679404 |
| O  | -0.35025234 | -1.60995022 | -4.05895429 |
| O  | -4.25791291 | -2.29279116 | -3.79074352 |
| O  | -2.28843436 | -0.03024489 | -3.78552376 |
| O  | -1.57151621 | -3.84394383 | -3.87474218 |
| Ti | -0.55465518 | 3.56257277  | 4.17193117  |
| Ti | 4.51018748  | 2.43624584  | 2.00948978  |
| Ti | 1.75726382  | 4.10658416  | 2.15447134  |
| O  | 1.46747055  | 3.39388949  | 4.06541922  |
| O  | 6.44370102  | 2.90409229  | 1.82251432  |
| O  | 3.78327842  | 4.30513554  | 2.11148981  |
| O  | -0.20839476 | 3.82796729  | 2.18856709  |
| O  | 2.55373534  | 2.15764435  | 1.89415187  |
| Ti | 0.28489494  | -0.36680238 | 3.59782233  |
| Ti | 5.04731834  | -1.28517728 | 1.59434781  |
| Ti | 2.48678889  | 0.25653497  | 1.80194287  |
| O  | 2.05219560  | 0.00655705  | 3.67262711  |
| O  | 7.06077344  | -0.75303383 | 1.59627026  |
| O  | 4.42552656  | 0.55343673  | 1.73693718  |
| O  | 0.43432977  | -0.18104613 | 1.81228042  |
| O  | 3.19794750  | -1.60346740 | 1.50841739  |
| Ti | 0.90450508  | -4.33830258 | 3.44784529  |
| Ti | 3.07549327  | -3.70350966 | 1.25677770  |
| O  | 2.78226828  | -3.59629154 | 3.36461654  |
| O  | 5.10669335  | -3.27147282 | 1.15481065  |
| O  | 1.16076293  | -3.95538926 | 1.36696796  |
| Ti | -0.63505150 | 3.60623184  | 0.30601608  |
| Ti | 4.27319591  | 2.80574037  | -1.99922849 |
| Ti | 1.59057329  | 4.41709586  | -1.58265190 |
| Ti | 6.77196030  | 3.08763457  | -0.17380264 |
| O  | 1.40391790  | 4.16724849  | 0.28612883  |
| O  | 6.38772377  | 3.03496145  | -2.14045652 |
| O  | 3.67068005  | 4.69346746  | -1.60996481 |
| O  | 8.80915221  | 3.35320096  | 0.15077882  |



|    |              |             |             |
|----|--------------|-------------|-------------|
| O  | 4.94982653   | 2.68558114  | -0.08693539 |
| O  | -0.34987965  | 4.14616022  | -1.50476975 |
| O  | 2.40009256   | 2.49006450  | -1.84281833 |
| Ti | 0.03813981   | 0.01539553  | -0.03132032 |
| Ti | 4.95057168   | -0.88260480 | -2.42587420 |
| Ti | 2.31204140   | 0.51073044  | -2.06543989 |
| Ti | 7.38247864   | -0.77846910 | -0.38614421 |
| O  | 1.94844123   | 0.31407671  | -0.11646788 |
| O  | 6.94365775   | -0.69223627 | -2.37576861 |
| O  | 4.25289031   | 0.86487635  | -2.11703273 |
| O  | 9.41800777   | -0.40686532 | -0.53249883 |
| O  | 5.54135647   | -0.97061776 | -0.39237645 |
| O  | 0.24430303   | 0.23617373  | -1.91837322 |
| O  | 3.00063950   | -1.26328147 | -2.19641953 |
| O  | 7.69332862   | 1.27719117  | -0.35629698 |
| Ti | 0.49879830   | -3.60422671 | -0.43112555 |
| Ti | 2.85451109   | -3.33870053 | -2.42429511 |
| O  | 2.69361717   | -3.55933134 | -0.57423934 |
| O  | 4.85191009   | -2.87923287 | -2.50546306 |
| O  | 0.89328279   | -3.69840012 | -2.31299816 |
| Ti | -0.83147418  | 4.30347359  | -3.59872108 |
| O  | 1.14890344   | 4.11256332  | -3.60614695 |
| Ti | -0.11498363  | 0.30414215  | -3.66778231 |
| O  | 1.66438820   | 0.56022093  | -3.90690140 |
| Ti | 0.37959774   | -3.50099636 | -4.34826095 |
| O  | 2.23072869   | -2.77355151 | -4.32236913 |
| Ti | 9.56742489   | 1.58324924  | -0.39983081 |
| O  | 10.92027564  | 1.56427334  | 0.82500244  |
| H  | 10.96138570  | 1.45773858  | 1.78750709  |
| O  | 10.25760159  | 2.00865715  | -2.03485836 |
| H  | 11.21386591  | 2.11920189  | -2.17143048 |
| H  | -9.80483148  | -4.31797622 | -0.08151319 |
| O  | -11.03266520 | -1.01099379 | 0.74050499  |
| H  | -11.93371861 | -1.37070706 | 0.77694820  |
| O  | 0.79335869   | -5.31663486 | -4.53277569 |
| H  | 0.65843363   | -5.88766859 | -3.75535314 |
| H  | 2.33273937   | -1.81295015 | -4.47440002 |
| O  | 0.62716427   | -4.57646418 | 5.20756520  |
| H  | -0.19346252  | -4.14673367 | 5.58633742  |
| H  | 3.35581484   | -4.24480234 | 3.81248993  |
| O  | -0.50256381  | 3.32903957  | 6.04182305  |
| H  | 0.35125674   | 3.32699484  | 6.50664403  |
| H  | -3.15369968  | 3.35832150  | 3.46837516  |
| H  | -2.83573284  | 3.86310794  | -2.06544317 |
| O  | -0.80102092  | 6.15044338  | -3.34491970 |
| H  | -1.02407120  | 6.68473927  | -4.12750198 |
| H  | 10.08950867  | -1.10523149 | -0.49398994 |
| O  | 7.94278324   | -2.54636320 | -0.38178848 |
| H  | 7.18104673   | -3.15700960 | -0.32034107 |
| O  | 5.02410045   | -0.60901961 | -4.24838174 |
| H  | 4.62073310   | 0.19884622  | -4.61524320 |
| H  | 7.46348399   | -0.36923539 | -3.12767212 |
| H  | 5.43861390   | -3.47601444 | -2.99807726 |
| O  | 3.32002714   | -4.97785487 | -3.08725932 |
| H  | 2.80507020   | -5.30127145 | -3.85658271 |
| O  | -7.99599470  | -0.38862798 | -3.05386238 |
| H  | -7.36831357  | 0.06632094  | -3.64535486 |

|   |             |             |             |
|---|-------------|-------------|-------------|
| H | -9.80606007 | -1.51374461 | -1.99099227 |
| H | -6.93045677 | -3.58149380 | -1.58593523 |
| O | -4.47822183 | -4.32191014 | -1.59124700 |
| H | -3.59002750 | -4.67395089 | -1.79981845 |
| O | -2.49959490 | -2.10726500 | -5.84299275 |
| H | -1.68796063 | -2.43989804 | -6.30147419 |
| H | -4.92464501 | -2.26244115 | -4.49408390 |
| O | 0.04416902  | -3.31883872 | -6.18371091 |
| H | 0.31107500  | -4.04396420 | -6.77462050 |
| H | -1.96896581 | -4.44536476 | -4.52888014 |
| H | -9.43457292 | -1.74898237 | 3.39811995  |
| O | -7.16096687 | -0.66898257 | 4.25361162  |
| H | -6.33763307 | -0.31309051 | 4.65055770  |
| O | -5.04291195 | 2.95555064  | 2.71198057  |
| H | -5.20096485 | 3.55412178  | 1.95932352  |
| H | -7.38393195 | 1.57908894  | 2.57493830  |
| H | -4.73379530 | 1.67464166  | 4.79732059  |
| O | -2.30980250 | 1.16777881  | 6.12845250  |
| H | -1.71904054 | 1.90895035  | 6.42084634  |
| O | 6.80478369  | 4.95151753  | -0.23887506 |
| H | 5.90426555  | 5.32732757  | -0.30037908 |
| H | 9.20113143  | 4.24078061  | 0.14518366  |
| H | 7.06581520  | 2.93707482  | 2.56400870  |
| O | 4.78760477  | 2.24747766  | 3.81707798  |
| H | 4.91782996  | 1.34929836  | 4.17407689  |
| O | 1.68212407  | 5.82854949  | 2.71764396  |
| H | 0.87481297  | 6.02590132  | 3.25619723  |
| H | 4.20186140  | 5.09418499  | 2.49178042  |
| H | 1.80670614  | 2.47841823  | 4.13437062  |
| O | -0.62733127 | 5.42878335  | 4.26134127  |
| H | -0.73480964 | 5.78202699  | 5.16239553  |
| O | -5.83132469 | 3.08964403  | -1.63949362 |
| H | -6.75757788 | 3.16745681  | -1.34958549 |
| H | -7.13857639 | 1.05669933  | 0.20762222  |
| O | -3.05870559 | 2.26731381  | -5.41439682 |
| H | -3.92564723 | 2.12886551  | -5.82887382 |
| H | -5.30098158 | 2.42406200  | -3.76921463 |
| H | 6.70298260  | 3.82854013  | -2.60399206 |
| O | 4.34634229  | 3.10303579  | -3.83391546 |
| H | 5.18413918  | 3.07236065  | -4.32287997 |
| O | 1.52831459  | 6.20867671  | -1.87031763 |
| H | 0.71752968  | 6.49665749  | -2.36465907 |
| H | 3.82111955  | 5.42072412  | -2.23974751 |
| H | 1.50377047  | 3.25978100  | -3.92545851 |
| O | -1.29188206 | 4.30036812  | -5.33194193 |
| H | -1.94722345 | 3.63188853  | -5.67169864 |
| O | -4.57209127 | -4.47459285 | 1.18729385  |
| H | -4.57193170 | -4.60234921 | 0.19660100  |
| H | -6.82680156 | -3.72566623 | 2.26358869  |
| H | -4.44627370 | -2.99607863 | 4.44588319  |
| O | -1.75980141 | -3.39636405 | 5.44949930  |
| H | -2.45019469 | -4.04404994 | 5.67223409  |
| O | 1.50345101  | -6.09163837 | 3.12660443  |
| H | 1.34367149  | -6.73323322 | 3.83945811  |
| H | -1.21983838 | -4.56609511 | 2.02761625  |
| H | 7.61238620  | -1.20812951 | 2.25246174  |
| O | 5.33740632  | -1.59226360 | 3.40867032  |

|   |            |             |            |
|---|------------|-------------|------------|
| H | 4.51969635 | -1.91434034 | 3.84088556 |
| O | 3.60996583 | -5.43183586 | 1.50525018 |
| H | 2.94241364 | -5.97799708 | 1.99624553 |
| H | 5.60348364 | -3.90972627 | 1.69411726 |

**(TiO<sub>2</sub>)<sub>84</sub>(H<sub>2</sub>O)<sub>24</sub>**

324

PBEx

|   |             |             |             |
|---|-------------|-------------|-------------|
| O | 19.56107896 | 18.62078274 | 37.45199887 |
| O | 16.78259710 | 15.09018374 | 44.27266624 |
| O | 16.70572545 | 17.28143102 | 42.05263354 |
| O | 15.01264715 | 15.07223571 | 46.71376899 |
| O | 18.99457984 | 16.76729603 | 39.59035254 |
| O | 19.21469556 | 20.54023392 | 39.49252611 |
| O | 20.85980782 | 20.63730557 | 41.86723358 |
| O | 21.07737132 | 22.62299569 | 44.16154078 |
| O | 22.87140995 | 22.70132176 | 46.57252642 |
| O | 13.25091505 | 13.58399175 | 55.53261466 |
| O | 24.78753958 | 13.36625170 | 55.44614404 |
| O | 13.49027987 | 24.93157205 | 51.32864178 |
| O | 24.55965118 | 24.50569381 | 55.30219732 |
| O | 24.75746724 | 22.77668456 | 57.75019826 |
| O | 22.88953133 | 24.58789608 | 48.90833393 |
| O | 24.61173530 | 24.34667262 | 51.30499252 |
| O | 15.09747945 | 15.34105441 | 60.26204152 |
| O | 17.20444176 | 17.40233100 | 64.97819794 |
| O | 15.21226524 | 17.24910132 | 62.64804496 |
| O | 17.31951910 | 19.07977650 | 67.31160115 |
| O | 20.65730813 | 21.34602765 | 64.72473959 |
| O | 21.07337031 | 19.04983056 | 67.25044737 |
| O | 22.96066687 | 21.08845715 | 62.45828203 |
| O | 19.17539727 | 18.54440358 | 69.36050139 |
| O | 19.27679885 | 16.71337886 | 67.04487757 |
| O | 21.42442134 | 18.41211179 | 39.72181225 |
| O | 12.00830409 | 25.82129582 | 53.34936303 |
| O | 25.54827866 | 11.80529731 | 53.44217226 |
| O | 25.98147310 | 25.61904314 | 53.29207415 |
| O | 12.05755028 | 12.16808024 | 53.55713535 |
| O | 22.81240923 | 19.74182545 | 65.25202615 |
| O | 18.82345644 | 22.55653048 | 41.16790355 |
| O | 23.03023633 | 20.62909491 | 43.66164414 |
| O | 21.27202246 | 23.25523399 | 62.60450578 |
| O | 21.00241227 | 24.71744025 | 45.92609517 |
| O | 24.97602313 | 21.06942341 | 60.35840216 |
| O | 22.99611891 | 24.92366670 | 57.81058328 |
| O | 24.90810768 | 22.73573239 | 48.59409707 |
| O | 26.80562323 | 22.82580146 | 55.98724329 |
| O | 23.01131415 | 26.70919263 | 50.57749359 |
| O | 15.33477970 | 19.51027763 | 65.57803494 |
| O | 18.26267849 | 15.08144674 | 41.62807977 |
| O | 17.06346903 | 15.23660727 | 63.33042345 |
| O | 14.69686330 | 17.09195479 | 44.20404820 |
| O | 13.14803430 | 17.30946560 | 60.91700246 |
| O | 16.92498712 | 13.01430257 | 46.12626402 |
| O | 13.02946151 | 15.09402038 | 48.66816198 |
| O | 15.00065747 | 13.32084109 | 58.32006555 |

|   |             |             |             |
|---|-------------|-------------|-------------|
| H | 19.83709365 | 16.60056615 | 66.23681235 |
| H | 19.08457178 | 19.25379706 | 70.01596116 |
| H | 18.83949770 | 18.74254520 | 36.81509467 |
| H | 21.51157628 | 17.90948104 | 40.56942216 |
| H | 11.57811117 | 26.06419375 | 54.18826009 |
| H | 12.73635262 | 24.92637770 | 50.71765058 |
| H | 25.74289980 | 11.34156198 | 52.60858506 |
| H | 24.80071190 | 12.61994537 | 56.06639213 |
| H | 26.42477924 | 25.78004893 | 54.14520156 |
| H | 25.07435259 | 23.78527516 | 50.65046820 |
| H | 11.78008732 | 11.73177744 | 52.73238395 |
| H | 13.56148171 | 12.94858664 | 56.20411646 |
| H | 21.83559252 | 18.67695811 | 67.72374980 |
| H | 23.14492739 | 20.47867720 | 65.79248451 |
| H | 19.45421269 | 21.30544151 | 38.94502894 |
| H | 18.08672375 | 23.08040117 | 41.53176592 |
| H | 23.56556293 | 19.87102889 | 43.95657601 |
| H | 21.52804620 | 20.44213055 | 41.18653099 |
| H | 19.74046616 | 21.56952948 | 64.98634606 |
| H | 21.73470182 | 23.66956051 | 61.84795070 |
| H | 20.26954289 | 25.27728412 | 46.23974104 |
| H | 21.06762651 | 23.34338275 | 43.51005455 |
| H | 23.33497112 | 20.36845165 | 63.00363341 |
| H | 25.41680945 | 20.21117114 | 60.22396525 |
| H | 22.20323973 | 25.40312804 | 57.50657919 |
| H | 25.39484731 | 22.54094881 | 58.45049810 |
| H | 23.58416670 | 22.65751450 | 45.91424342 |
| H | 25.42769664 | 21.92566460 | 48.74670897 |
| H | 23.95668193 | 24.91331582 | 55.96775751 |
| H | 27.46322572 | 22.13332555 | 55.80899147 |
| H | 23.02533471 | 25.29207660 | 48.25325119 |
| H | 22.34862292 | 27.40156381 | 50.73701099 |
| H | 16.53893212 | 18.87256569 | 67.85091244 |
| H | 14.85920524 | 20.28512307 | 65.22693468 |
| H | 19.36881333 | 15.99270246 | 39.13828454 |
| H | 17.61218724 | 14.75010837 | 40.98564209 |
| H | 17.52093487 | 16.78497362 | 65.66501979 |
| H | 16.37319600 | 14.80496172 | 63.85940638 |
| H | 16.46960606 | 18.17563827 | 41.73406174 |
| H | 14.29045064 | 17.60926506 | 44.92901088 |
| H | 12.54297955 | 17.70003186 | 60.25933489 |
| H | 14.52301851 | 17.50147247 | 63.28559872 |
| H | 17.34282178 | 14.63603822 | 43.60624953 |
| H | 17.27516110 | 12.41484876 | 46.81135771 |
| H | 12.53780269 | 14.47102043 | 49.23690292 |
| H | 14.27544395 | 14.85938633 | 46.11747159 |
| H | 14.92008987 | 14.60615791 | 60.86976347 |
| H | 15.83777317 | 12.82571558 | 58.37326103 |
| O | 16.97528651 | 16.99213746 | 45.92497583 |
| O | 16.92851878 | 15.13625319 | 48.19568514 |
| O | 20.69111977 | 17.06626471 | 46.03000551 |
| O | 18.67769427 | 17.03903161 | 43.65528464 |
| O | 20.66797074 | 15.20372888 | 48.42430366 |
| O | 20.76949608 | 15.13511676 | 44.43953665 |
| O | 20.60066229 | 16.84943724 | 42.07597718 |
| O | 18.89758913 | 14.84917942 | 46.69229742 |
| O | 22.56502278 | 14.96169235 | 46.79628266 |

|   |             |             |             |
|---|-------------|-------------|-------------|
| O | 17.18177585 | 20.75246171 | 46.01448613 |
| O | 17.01313456 | 18.98791786 | 48.39334488 |
| O | 16.73421710 | 18.96350600 | 44.37572667 |
| O | 17.03262799 | 20.68430799 | 42.08048913 |
| O | 15.09065418 | 18.91515340 | 46.80607776 |
| O | 18.75198764 | 18.72461816 | 40.97442905 |
| O | 20.85103996 | 20.79468452 | 45.75024336 |
| O | 19.08452380 | 20.65080031 | 43.48606696 |
| O | 20.86509319 | 18.88970024 | 48.35202843 |
| O | 21.09781264 | 18.76801096 | 44.27741116 |
| O | 18.93060693 | 18.91234477 | 46.76008673 |
| O | 22.76174459 | 18.90279216 | 46.74870791 |
| O | 17.21633038 | 22.68399976 | 48.33018352 |
| O | 17.06934239 | 22.60119978 | 44.33150158 |
| O | 15.30979023 | 22.86018660 | 46.70497028 |
| O | 20.97268680 | 22.62747910 | 48.07888959 |
| O | 18.99573020 | 22.97540038 | 46.57599967 |
| O | 13.32155999 | 13.52276387 | 51.55972455 |
| O | 17.00918429 | 13.33002746 | 55.41814826 |
| O | 15.14566361 | 13.07444626 | 53.22185347 |
| O | 15.00595100 | 13.30929770 | 49.26291114 |
| O | 16.99151087 | 13.01609800 | 51.50965481 |
| O | 20.77812019 | 13.22300512 | 55.35435913 |
| O | 18.86795151 | 12.97508307 | 53.15395240 |
| O | 18.76845460 | 13.20665456 | 49.22204354 |
| O | 20.72164580 | 13.00076585 | 51.45383492 |
| O | 22.60252907 | 12.93873767 | 53.16476440 |
| O | 22.71894238 | 13.28366772 | 49.18602240 |
| O | 24.44076176 | 13.35107014 | 51.48834240 |
| O | 12.94155066 | 17.28064206 | 55.48930520 |
| O | 13.25173512 | 15.33236294 | 57.76997335 |
| O | 12.95766493 | 15.36100269 | 53.86153805 |
| O | 13.18552199 | 17.17318763 | 51.57023469 |
| O | 15.26158902 | 15.30012449 | 50.72729877 |
| O | 17.13059536 | 17.13148288 | 55.38957975 |
| O | 15.09479601 | 17.16849559 | 53.18282363 |
| O | 17.09523835 | 15.03282070 | 57.84544746 |
| O | 17.01827662 | 15.19950310 | 53.75349291 |
| O | 14.87734840 | 17.16838003 | 49.09013994 |
| O | 16.98662718 | 17.19427197 | 51.49327471 |
| O | 15.20126152 | 15.50988254 | 56.23393612 |
| O | 18.81646724 | 15.14554067 | 50.78369930 |
| O | 20.81235725 | 17.06990689 | 55.37347716 |
| O | 18.91834458 | 17.05787665 | 53.06625395 |
| O | 20.85532549 | 14.92276187 | 57.83560854 |
| O | 20.77900682 | 15.12658239 | 53.73145308 |
| O | 18.83328514 | 17.03264887 | 49.11293207 |
| O | 20.81789717 | 17.11696820 | 51.46219610 |
| O | 18.95722619 | 15.22890828 | 56.19353503 |
| O | 22.49082966 | 15.21235990 | 50.78622855 |
| O | 24.96215905 | 17.04465319 | 55.45539722 |
| O | 22.75313742 | 17.06852066 | 53.10952622 |
| O | 24.54604039 | 15.07849960 | 57.72160463 |
| O | 24.80883162 | 15.14737934 | 53.77272208 |
| O | 23.01685390 | 16.96379836 | 49.02102104 |
| O | 24.67519632 | 16.99445560 | 51.52504443 |
| O | 22.67988512 | 15.29736849 | 56.04594025 |

|   |             |             |             |
|---|-------------|-------------|-------------|
| O | 13.07060860 | 21.00815631 | 55.43736476 |
| O | 13.27780163 | 19.09121492 | 57.71439822 |
| O | 12.96890847 | 19.10732261 | 53.78512375 |
| O | 13.21650105 | 20.98665510 | 51.53804324 |
| O | 15.09961431 | 19.06383721 | 50.69446944 |
| O | 17.20019567 | 20.96586599 | 55.32524226 |
| O | 15.15860062 | 20.93644145 | 53.10792588 |
| O | 17.08841327 | 19.03016397 | 57.72503905 |
| O | 17.05007467 | 19.02609362 | 53.76627782 |
| O | 14.86695945 | 20.94674428 | 49.01810074 |
| O | 17.06055284 | 20.85716072 | 51.40801458 |
| O | 15.17067328 | 19.05719185 | 56.09100550 |
| O | 18.95274267 | 18.96854382 | 50.67848243 |
| O | 20.87742026 | 20.90320541 | 55.30971220 |
| O | 18.97345971 | 20.90270510 | 53.00319141 |
| O | 20.90743174 | 19.07548825 | 57.70613696 |
| O | 20.83780654 | 18.95493837 | 53.74728831 |
| O | 19.02954217 | 20.85391311 | 49.05474962 |
| O | 20.90592231 | 20.80026256 | 51.41729275 |
| O | 18.99774075 | 19.03381515 | 56.11527675 |
| O | 22.77358057 | 18.92064126 | 50.61745198 |
| O | 25.01640053 | 20.76949277 | 55.36387864 |
| O | 22.79702393 | 20.79887931 | 53.05688659 |
| O | 24.74427494 | 19.05920847 | 57.63431920 |
| O | 24.95712111 | 18.88733011 | 53.71003772 |
| O | 23.09100578 | 20.70531975 | 48.93904245 |
| O | 24.70183107 | 20.84536461 | 51.45934862 |
| O | 22.81471461 | 18.98702624 | 56.01436705 |
| O | 13.57579607 | 24.72264041 | 55.29173789 |
| O | 13.48861820 | 23.05902918 | 57.64398242 |
| O | 13.05009312 | 22.84842472 | 53.68714834 |
| O | 15.37539344 | 22.78422483 | 50.74271625 |
| O | 17.20331748 | 24.84292222 | 55.16845539 |
| O | 15.31669974 | 24.98114481 | 52.94331961 |
| O | 17.16476742 | 23.23009959 | 57.69828087 |
| O | 17.16079435 | 22.87226920 | 53.62677055 |
| O | 15.13776618 | 24.61029315 | 49.03330820 |
| O | 17.19616654 | 25.02142883 | 51.22822059 |
| O | 15.35909508 | 22.70177948 | 55.99337966 |
| O | 19.05273358 | 22.78638889 | 50.67459066 |
| O | 21.07882121 | 24.71913005 | 55.18441233 |
| O | 19.07440473 | 24.96315382 | 52.94016770 |
| O | 20.92680612 | 23.13560764 | 57.69362138 |
| O | 20.96435395 | 22.77191829 | 53.61790252 |
| O | 19.15710113 | 24.66326801 | 49.03729470 |
| O | 20.92216955 | 24.94437180 | 51.25411186 |
| O | 19.07693955 | 22.88656147 | 56.05210585 |
| O | 22.66254353 | 22.67830957 | 50.45713688 |
| O | 22.82155265 | 24.93695977 | 52.92932712 |
| O | 24.99989115 | 22.63370902 | 53.67468965 |
| O | 22.87621814 | 22.61950650 | 56.12290015 |
| O | 15.20704036 | 17.20502025 | 58.72901483 |
| O | 17.07818091 | 17.26477950 | 61.06166273 |
| O | 18.92032595 | 15.29238558 | 60.09497056 |
| O | 20.99949728 | 17.45701237 | 64.76192745 |
| O | 19.08425446 | 17.02623347 | 62.55792736 |
| O | 18.96562331 | 17.16398621 | 58.47596005 |

|    |             |             |             |
|----|-------------|-------------|-------------|
| O  | 20.81648108 | 17.32033730 | 60.81054689 |
| O  | 22.87415588 | 15.38285115 | 60.09560643 |
| O  | 22.74832506 | 17.24101402 | 62.39790580 |
| O  | 22.64988849 | 17.20650888 | 58.38161690 |
| O  | 14.98245538 | 19.23043287 | 60.18661709 |
| O  | 17.32723374 | 21.18860114 | 64.66799242 |
| O  | 15.41892415 | 21.19803551 | 62.41299761 |
| O  | 17.24589063 | 19.10820048 | 63.29533957 |
| O  | 15.34850622 | 20.94719758 | 58.40755245 |
| O  | 17.25926478 | 20.96085639 | 60.74238867 |
| O  | 19.02974253 | 19.12533770 | 60.04591512 |
| O  | 19.06442432 | 21.39605959 | 62.38924913 |
| O  | 20.91361894 | 19.36360134 | 63.15326474 |
| O  | 19.02413231 | 21.01839011 | 58.36525424 |
| O  | 21.02156740 | 21.05163230 | 60.83627643 |
| O  | 19.16536841 | 19.38801159 | 65.82997835 |
| O  | 23.11307499 | 19.03314976 | 60.08147027 |
| O  | 22.73445935 | 20.99007397 | 58.48542912 |
| O  | 15.20591653 | 22.88832881 | 59.99520995 |
| O  | 19.14021622 | 22.97517436 | 59.90564596 |
| O  | 22.96614339 | 22.94364103 | 60.02700579 |
| Ti | 16.49843052 | 17.07729772 | 44.02333623 |
| Ti | 17.03186892 | 14.81476811 | 46.27989314 |
| Ti | 20.44414757 | 16.89834720 | 43.90903368 |
| Ti | 18.75911684 | 16.87986591 | 41.66427107 |
| Ti | 20.80659712 | 15.29892255 | 46.25728032 |
| Ti | 17.34230475 | 20.79116323 | 43.89654980 |
| Ti | 16.94441709 | 18.78860704 | 46.33498892 |
| Ti | 19.68093576 | 18.60575661 | 39.27231529 |
| Ti | 21.20881653 | 20.61279664 | 43.80689803 |
| Ti | 18.78516309 | 20.73634656 | 41.48546982 |
| Ti | 20.94862797 | 19.00739418 | 46.27405827 |
| Ti | 17.07342638 | 22.51684097 | 46.16112856 |
| Ti | 20.86577981 | 22.90004944 | 46.14230869 |
| Ti | 13.30265617 | 13.51228465 | 53.38502985 |
| Ti | 17.01565256 | 13.41474056 | 53.58635093 |
| Ti | 15.14108782 | 13.52757457 | 51.06658262 |
| Ti | 20.73312862 | 13.34367781 | 53.51334337 |
| Ti | 18.85215017 | 13.36023276 | 51.04348653 |
| Ti | 24.44765087 | 13.28284988 | 53.29841227 |
| Ti | 22.63268737 | 13.44388489 | 50.99957584 |
| Ti | 13.31354373 | 17.21753804 | 53.38255521 |
| Ti | 13.42161659 | 15.48321550 | 55.96430602 |
| Ti | 14.84416816 | 15.08523799 | 48.69187309 |
| Ti | 17.05721158 | 17.16129526 | 53.43071117 |
| Ti | 14.98458522 | 17.21634631 | 51.03859807 |
| Ti | 17.11422757 | 15.13449323 | 55.88909876 |
| Ti | 18.72801363 | 15.00778503 | 48.70692028 |
| Ti | 20.77104214 | 17.09531034 | 53.40802729 |
| Ti | 18.91515870 | 17.12261360 | 51.03868389 |
| Ti | 20.79314009 | 15.00261081 | 55.83443022 |
| Ti | 22.43412136 | 15.04557385 | 48.61686470 |
| Ti | 24.53909753 | 16.99574013 | 53.33681344 |
| Ti | 22.87660910 | 17.11149726 | 51.04038207 |
| Ti | 24.46025680 | 15.22627368 | 55.92684384 |
| Ti | 13.37702294 | 20.95397598 | 53.37669208 |
| Ti | 13.38790271 | 19.15304038 | 55.88884821 |

|    |             |             |             |
|----|-------------|-------------|-------------|
| Ti | 15.22638648 | 19.01261512 | 48.60519350 |
| Ti | 17.11707116 | 20.87647518 | 53.43941496 |
| Ti | 14.98174888 | 20.90923278 | 51.01808059 |
| Ti | 17.15942358 | 19.02839710 | 55.81246348 |
| Ti | 18.94005227 | 18.94070507 | 48.63960933 |
| Ti | 20.81814151 | 20.79812862 | 53.36644136 |
| Ti | 18.88614858 | 20.82430201 | 50.99475868 |
| Ti | 20.85363819 | 18.94091415 | 55.78965019 |
| Ti | 22.64329121 | 18.80833900 | 48.57202301 |
| Ti | 24.57810468 | 20.71957835 | 53.24154810 |
| Ti | 22.81379471 | 20.87845601 | 50.98150140 |
| Ti | 24.58523498 | 18.90267910 | 55.83620643 |
| Ti | 13.45247429 | 24.67864682 | 53.49084462 |
| Ti | 13.60414411 | 22.92049937 | 55.82989238 |
| Ti | 15.45117371 | 22.80960173 | 48.51794967 |
| Ti | 17.16677757 | 24.65090450 | 53.37538193 |
| Ti | 15.33891581 | 24.56463833 | 50.83593929 |
| Ti | 17.28508924 | 23.04420705 | 55.70790347 |
| Ti | 19.18505395 | 22.84080398 | 48.58160924 |
| Ti | 20.91845058 | 24.54946452 | 53.42035591 |
| Ti | 19.02546322 | 24.56834226 | 50.85961824 |
| Ti | 21.11159270 | 22.82733458 | 55.72540289 |
| Ti | 23.06079827 | 22.56225666 | 48.57345403 |
| Ti | 24.61080240 | 24.41580315 | 53.29929192 |
| Ti | 22.72271789 | 24.93819286 | 50.84840136 |
| Ti | 25.00479315 | 22.57956433 | 55.79610871 |
| Ti | 15.03970024 | 15.16155197 | 58.29109532 |
| Ti | 17.24641691 | 17.02375934 | 63.02545121 |
| Ti | 14.95115178 | 17.37559479 | 60.67475840 |
| Ti | 18.96541522 | 15.38162377 | 58.29281527 |
| Ti | 20.98862521 | 17.59241426 | 62.92105293 |
| Ti | 18.85977819 | 17.12463236 | 60.55673554 |
| Ti | 22.75774112 | 15.44776538 | 58.29087822 |
| Ti | 22.58298571 | 17.19013304 | 60.57705693 |
| Ti | 15.09009863 | 19.01252786 | 58.18858084 |
| Ti | 17.21245697 | 20.85600509 | 62.85273589 |
| Ti | 15.49676229 | 21.13935171 | 60.58151989 |
| Ti | 17.16285787 | 19.45853152 | 65.30158568 |
| Ti | 19.01966187 | 19.09213245 | 58.18942036 |
| Ti | 20.99199697 | 21.48752643 | 62.76758585 |
| Ti | 19.22334756 | 21.18096207 | 60.44696548 |
| Ti | 21.01453795 | 19.29609168 | 65.16936162 |
| Ti | 22.93004875 | 19.18395356 | 58.17981119 |
| Ti | 23.13646951 | 21.14079032 | 60.41892302 |
| Ti | 15.25216148 | 22.71431245 | 58.17607945 |
| Ti | 19.02625008 | 22.79608424 | 58.10416464 |
| Ti | 22.80668586 | 23.10420963 | 58.18653095 |
| Ti | 19.20890017 | 18.46227283 | 67.53779000 |

**(TiO<sub>2</sub>)<sub>84</sub>(H<sub>2</sub>O)<sub>55</sub>**

417

PBE xc

|   |             |             |             |
|---|-------------|-------------|-------------|
| O | 19.82757400 | 17.88218951 | 37.56538790 |
| O | 16.35204605 | 15.31145186 | 44.18819405 |
| O | 16.53712887 | 17.31463845 | 42.13736830 |
| O | 15.14955100 | 14.71660572 | 46.70018618 |



|   |             |             |             |
|---|-------------|-------------|-------------|
| O | 21.50197311 | 15.19892723 | 44.15655524 |
| O | 18.75127815 | 16.43388973 | 39.69175426 |
| O | 20.37561057 | 15.97179601 | 41.86621904 |
| O | 22.69640113 | 14.70007817 | 46.60899613 |
| O | 16.75918838 | 20.05690774 | 41.70780501 |
| O | 15.06027055 | 19.41588685 | 46.63646092 |
| O | 19.29453300 | 20.01743701 | 39.30673295 |
| O | 20.65858754 | 20.81085439 | 41.61981875 |
| O | 22.74546910 | 18.94568302 | 46.51450699 |
| O | 17.01510272 | 22.86252347 | 44.13939277 |
| O | 15.13844546 | 22.41153182 | 46.59786036 |
| O | 21.06137274 | 22.63886063 | 44.03091495 |
| O | 22.82472664 | 22.60698541 | 46.46661335 |
| O | 13.60497220 | 13.35259412 | 55.68180633 |
| O | 13.31728670 | 13.55250141 | 51.77281655 |
| O | 15.01061454 | 13.26190830 | 49.20970472 |
| O | 18.94158403 | 13.20088994 | 49.05593316 |
| O | 24.45020767 | 13.24056190 | 55.37322234 |
| O | 22.88969563 | 13.22060215 | 49.09182954 |
| O | 24.69004332 | 13.51102354 | 51.49143602 |
| O | 13.32174658 | 15.29856876 | 57.95825902 |
| O | 13.26722471 | 17.08726181 | 51.53016521 |
| O | 24.80254215 | 15.06469812 | 57.77356739 |
| O | 13.37073834 | 19.13708901 | 57.91879919 |
| O | 24.90868698 | 19.02530279 | 57.74630777 |
| O | 13.78029909 | 24.87601164 | 55.30777691 |
| O | 13.49445332 | 22.92705321 | 57.87668753 |
| O | 13.36862826 | 24.30362277 | 51.47184349 |
| O | 15.47705462 | 24.76189541 | 48.87800473 |
| O | 19.07718314 | 24.73715244 | 48.90352681 |
| O | 24.59899214 | 24.72014408 | 55.13610042 |
| O | 24.90990764 | 22.90032100 | 57.62413551 |
| O | 22.72602124 | 24.62858570 | 48.82690028 |
| O | 24.83330238 | 24.24677058 | 51.27204103 |
| O | 15.47204466 | 15.15312047 | 60.25842078 |
| O | 16.19482010 | 17.75323359 | 65.01470128 |
| O | 15.28558320 | 17.03962452 | 62.64455840 |
| O | 18.89897753 | 15.26039989 | 60.31859622 |
| O | 20.97890874 | 17.39370222 | 65.08036082 |
| O | 23.08495402 | 15.27179354 | 60.24303543 |
| O | 22.80109183 | 17.20619020 | 62.65677111 |
| O | 17.51014296 | 21.47312015 | 64.92974648 |
| O | 15.06942565 | 21.20327765 | 62.53937675 |
| O | 16.82686345 | 19.06227730 | 67.39232539 |
| O | 20.26116411 | 21.23461130 | 65.10989040 |
| O | 20.45795068 | 18.66958378 | 67.50135405 |
| O | 22.96272269 | 21.02579310 | 62.59323214 |
| O | 15.30853661 | 23.02309332 | 60.18669265 |
| O | 19.13709274 | 23.00198850 | 60.10737955 |
| O | 23.40851255 | 22.73991174 | 60.13968037 |
| O | 18.48911746 | 17.88254465 | 69.33159291 |
| O | 18.35427348 | 16.42172730 | 66.84005903 |
| O | 21.50613869 | 17.90910648 | 39.91493231 |
| O | 11.49772364 | 24.86698581 | 53.78329969 |
| O | 24.75895737 | 11.31782951 | 53.10339296 |
| O | 24.96162491 | 26.52998957 | 52.77590671 |
| O | 11.53554075 | 13.16768864 | 53.84715224 |

|   |             |             |             |
|---|-------------|-------------|-------------|
| O | 22.41069121 | 19.87173367 | 66.06749568 |
| O | 18.19539154 | 22.07381090 | 40.48791673 |
| O | 22.67810782 | 20.29848166 | 43.32836068 |
| O | 21.16316538 | 22.99465681 | 63.34438766 |
| O | 21.01765994 | 24.66294571 | 45.82242850 |
| O | 24.88995663 | 20.25476887 | 60.82113782 |
| O | 22.59768855 | 24.62175243 | 58.46485579 |
| O | 24.77237370 | 22.89529737 | 48.33471943 |
| O | 26.80908216 | 23.09740955 | 55.72466393 |
| O | 23.20770807 | 26.48370029 | 50.71447911 |
| O | 15.14015676 | 20.37258783 | 65.74738419 |
| O | 17.62127869 | 14.87593176 | 41.80636720 |
| O | 17.80803187 | 15.98826775 | 64.14434601 |
| O | 14.27871115 | 17.56087498 | 44.31386454 |
| O | 13.34914498 | 16.96409819 | 60.80659118 |
| O | 17.53971412 | 13.36431847 | 45.69037494 |
| O | 13.30556198 | 15.62293000 | 48.39038802 |
| O | 15.07458697 | 13.24023022 | 58.20329451 |
| O | 11.41371013 | 15.05435198 | 55.89833116 |
| O | 15.02274757 | 11.36329141 | 51.07022854 |
| O | 13.52725732 | 11.25209345 | 53.55752278 |
| O | 26.88945337 | 24.67378691 | 53.48634095 |
| O | 16.93826839 | 23.16797849 | 62.93592286 |
| O | 15.10731813 | 21.22240185 | 43.49445534 |
| O | 16.76138790 | 24.72625580 | 46.14738604 |
| O | 13.22936805 | 21.10065320 | 60.29123939 |
| O | 15.41385106 | 24.97892287 | 58.27295026 |
| O | 13.31289975 | 23.14629806 | 48.39004049 |
| O | 11.57781807 | 23.22957516 | 55.97919077 |
| O | 14.84043073 | 26.51223706 | 50.70199416 |
| O | 13.31064900 | 26.74460377 | 52.92985492 |
| O | 22.33610225 | 17.66342594 | 42.61107149 |
| O | 20.23574011 | 13.35961564 | 45.63741378 |
| O | 24.59496974 | 15.51877197 | 48.28114193 |
| O | 23.00445577 | 11.27776649 | 50.98076475 |
| O | 26.72162624 | 13.20493898 | 53.71365381 |
| O | 20.39360564 | 15.51726421 | 63.45651168 |
| O | 24.76042012 | 17.56439961 | 60.94442476 |
| O | 22.47147148 | 13.35972578 | 58.48842436 |
| O | 26.69361492 | 14.92632335 | 55.87521398 |
| O | 13.25835624 | 18.44497295 | 48.45471328 |
| O | 24.70256807 | 18.51607934 | 48.23833013 |
| O | 19.44926860 | 13.33440025 | 58.44063456 |
| O | 19.61171155 | 24.83168249 | 58.26401271 |
| O | 19.24416292 | 26.85052978 | 50.65305515 |
| O | 11.28651980 | 19.42462751 | 56.13087735 |
| O | 26.97688214 | 18.86730063 | 55.90825087 |
| O | 18.81199541 | 11.16664357 | 50.83654544 |
| O | 11.31710796 | 16.97461103 | 53.39138695 |
| H | 18.21256299 | 16.21171287 | 65.86707614 |
| H | 18.55525539 | 18.51722413 | 70.06238687 |
| H | 19.13664059 | 17.85308553 | 36.88501296 |
| H | 21.82576681 | 17.95448727 | 40.86286104 |
| H | 11.23652264 | 24.29030954 | 54.55384725 |
| H | 13.28301469 | 23.32491709 | 51.47444840 |
| H | 24.18619243 | 11.00664493 | 52.35195373 |
| H | 23.52079908 | 13.05062760 | 55.61257692 |

|   |             |             |             |
|---|-------------|-------------|-------------|
| H | 24.35260581 | 26.80393608 | 52.03359529 |
| H | 25.02395512 | 23.29836157 | 51.11554588 |
| H | 11.01252720 | 13.28352843 | 53.03580734 |
| H | 14.22968475 | 12.99704511 | 56.35562361 |
| H | 21.15803601 | 18.25444832 | 68.02970912 |
| H | 22.58538385 | 20.36140965 | 66.88810966 |
| H | 19.49208749 | 20.67630512 | 38.62280900 |
| H | 18.09318764 | 22.82167847 | 41.10441580 |
| H | 22.79390776 | 19.34136335 | 43.05844603 |
| H | 21.38320261 | 20.60976171 | 41.00538576 |
| H | 19.27879967 | 21.39930944 | 65.09315401 |
| H | 20.94941700 | 23.28302789 | 64.24932954 |
| H | 20.19714368 | 25.15746770 | 45.64976249 |
| H | 21.18452554 | 23.40262226 | 43.44696520 |
| H | 23.65688616 | 20.78245431 | 63.22621789 |
| H | 25.00918206 | 19.25950393 | 60.93811794 |
| H | 21.65403008 | 24.91036056 | 58.48097596 |
| H | 25.65407074 | 23.14715926 | 58.19681001 |
| H | 23.57707932 | 22.64238962 | 45.85642039 |
| H | 25.17958451 | 23.76485645 | 48.18406567 |
| H | 23.66410935 | 24.91755500 | 55.34882956 |
| H | 27.15943680 | 23.64865096 | 54.97551286 |
| H | 21.91961952 | 24.97227836 | 48.39785847 |
| H | 23.51379095 | 26.70996755 | 49.81818709 |
| H | 16.02476278 | 18.87224727 | 67.90588385 |
| H | 14.62517399 | 20.53223224 | 64.93106004 |
| H | 18.98349671 | 15.61699496 | 39.22041475 |
| H | 16.92103315 | 14.67855067 | 41.16047190 |
| H | 16.31189603 | 17.04397238 | 65.67129683 |
| H | 18.71550606 | 15.66782779 | 63.85703204 |
| H | 16.52589319 | 18.27884927 | 41.87951874 |
| H | 14.11464385 | 18.16048531 | 45.07827034 |
| H | 12.88040785 | 16.86869542 | 59.95313113 |
| H | 14.56633493 | 17.14564483 | 63.28896533 |
| H | 16.84544959 | 14.91513393 | 43.41677913 |
| H | 16.90727371 | 12.87603010 | 45.13742828 |
| H | 13.08769382 | 16.59105227 | 48.32748218 |
| H | 14.37176993 | 14.92436593 | 46.15476416 |
| H | 14.97865912 | 14.50427296 | 60.78623372 |
| H | 15.86945657 | 12.68297696 | 58.28731511 |
| H | 12.70460824 | 14.64043979 | 58.32204206 |
| H | 11.17087999 | 14.30471343 | 55.29619473 |
| H | 14.57842711 | 10.98418065 | 51.86707429 |
| H | 14.88097079 | 12.49261023 | 48.63301324 |
| H | 12.67905668 | 10.78307985 | 53.65294185 |
| H | 13.09928167 | 14.48483748 | 51.57476520 |
| H | 23.21421810 | 23.50455469 | 60.70763828 |
| H | 27.38894390 | 25.50001228 | 53.36256971 |
| H | 17.05660367 | 22.25746995 | 65.28534267 |
| H | 16.78685314 | 23.57591110 | 62.05930253 |
| H | 16.11321226 | 20.60474021 | 41.22859611 |
| H | 14.55596646 | 20.48123634 | 43.18608431 |
| H | 16.39749217 | 25.05256274 | 47.00107440 |
| H | 16.27874557 | 23.39214050 | 43.78721600 |
| H | 14.72626175 | 22.08451644 | 62.77010167 |
| H | 12.67738486 | 20.87461379 | 61.05846359 |
| H | 16.23404640 | 25.49848037 | 58.19700532 |

|   |             |             |             |
|---|-------------|-------------|-------------|
| H | 14.68597039 | 23.68467263 | 60.53114722 |
| H | 14.39635534 | 22.79151751 | 46.09688037 |
| H | 12.79658075 | 23.57372005 | 49.09852854 |
| H | 11.33253363 | 23.64994709 | 56.82250697 |
| H | 13.04802226 | 22.34127501 | 58.52311517 |
| H | 14.77951085 | 25.40711356 | 48.65845383 |
| H | 14.29778313 | 26.88841691 | 51.44641219 |
| H | 14.71867271 | 25.09872249 | 55.47486303 |
| H | 12.47642222 | 27.23724315 | 53.02175041 |
| H | 23.03445174 | 16.99050911 | 42.52001348 |
| H | 20.97500709 | 16.10422076 | 41.10996831 |
| H | 21.26793902 | 14.46243668 | 43.56266490 |
| H | 19.25344539 | 13.19192817 | 45.54259544 |
| H | 24.86874019 | 16.46637379 | 48.23479269 |
| H | 23.45029273 | 14.84509194 | 46.01486145 |
| H | 23.06146727 | 12.46044959 | 48.51452144 |
| H | 22.22618848 | 10.69321257 | 51.00393466 |
| H | 27.22098992 | 12.37564636 | 53.61207023 |
| H | 24.94004825 | 14.42202637 | 51.23828037 |
| H | 20.73639784 | 16.61093305 | 65.60363615 |
| H | 20.36618304 | 14.99474363 | 62.63172081 |
| H | 25.30975467 | 17.20101658 | 60.22489012 |
| H | 23.55920743 | 17.41662784 | 63.22495134 |
| H | 22.88285016 | 14.50852129 | 60.80657333 |
| H | 21.52277405 | 13.09876299 | 58.56557342 |
| H | 27.02794444 | 14.34062767 | 55.14587172 |
| H | 25.50905823 | 14.57269128 | 58.22219620 |
| H | 12.70551152 | 19.01835819 | 47.89666081 |
| H | 14.92955288 | 20.38651737 | 46.50642992 |
| H | 23.49646206 | 19.15281730 | 45.93458438 |
| H | 25.30467248 | 18.86241933 | 48.92460249 |
| H | 19.37333257 | 12.85071916 | 57.59384579 |
| H | 18.03379006 | 14.88873816 | 60.58010900 |
| H | 19.47901741 | 23.72492956 | 60.65957840 |
| H | 19.62587268 | 25.29926406 | 57.40510819 |
| H | 18.70759273 | 25.41665799 | 48.31648752 |
| H | 20.11968887 | 27.27595450 | 50.60172193 |
| H | 10.87753025 | 20.30812236 | 56.09116693 |
| H | 12.83930194 | 19.62134674 | 58.58121955 |
| H | 25.48674869 | 19.60835901 | 58.27085576 |
| H | 27.39903509 | 18.00066766 | 56.05702017 |
| H | 17.92315899 | 10.76656219 | 50.79016441 |
| H | 18.97337122 | 12.45914664 | 48.43026370 |
| H | 12.56657900 | 17.37482054 | 50.91892445 |
| H | 10.88893861 | 16.51758905 | 54.14739177 |
| O | 16.65141869 | 17.12916898 | 45.90010145 |
| O | 17.06620127 | 15.09524504 | 48.11262524 |
| O | 20.93063833 | 17.01445225 | 45.58340757 |
| O | 18.87762898 | 16.79616324 | 43.52387217 |
| O | 20.81004600 | 15.06895590 | 48.05164900 |
| O | 18.90233398 | 15.45550581 | 46.49749079 |
| O | 17.24728231 | 20.88722922 | 45.68582144 |
| O | 17.05415890 | 19.01268127 | 48.15699607 |
| O | 16.73189392 | 18.99333671 | 44.23257153 |
| O | 18.86955846 | 18.42828417 | 41.08016023 |
| O | 20.75659608 | 20.79480366 | 45.58541656 |
| O | 18.75128709 | 20.85060757 | 43.08081631 |

|   |             |             |             |
|---|-------------|-------------|-------------|
| O | 20.85632841 | 18.94712370 | 48.02820686 |
| O | 20.53542928 | 18.88160381 | 44.02545090 |
| O | 18.91486863 | 18.81594182 | 46.50788113 |
| O | 17.12343752 | 22.71595491 | 48.09241369 |
| O | 20.93773701 | 22.67917679 | 48.01452026 |
| O | 19.01354115 | 22.92529080 | 46.42915384 |
| O | 17.15614654 | 13.39469067 | 55.42746715 |
| O | 15.34999355 | 13.12547103 | 53.21549414 |
| O | 17.13765207 | 13.31091283 | 51.47980279 |
| O | 20.98124945 | 13.37886969 | 55.38743491 |
| O | 19.01709327 | 13.01219081 | 53.14606336 |
| O | 20.83923340 | 13.11677086 | 51.39875340 |
| O | 22.69960129 | 13.18089533 | 53.08990046 |
| O | 13.16325680 | 17.27509048 | 55.57186073 |
| O | 13.45251049 | 15.30605631 | 54.02076095 |
| O | 15.19144112 | 15.18736192 | 50.66568353 |
| O | 17.18664324 | 17.17925019 | 55.40838311 |
| O | 15.22112681 | 17.17163794 | 53.02228829 |
| O | 17.20085427 | 15.07759852 | 57.92222532 |
| O | 17.19544712 | 15.28431380 | 53.82544368 |
| O | 15.39582329 | 17.06963907 | 49.04743715 |
| O | 17.12249668 | 17.11094201 | 51.42228865 |
| O | 15.29709215 | 15.42827406 | 56.33918084 |
| O | 19.01208948 | 15.14982313 | 50.53564190 |
| O | 20.92990205 | 17.15141754 | 55.36720203 |
| O | 18.97385016 | 17.13368858 | 52.97246852 |
| O | 21.01060984 | 15.48024107 | 57.84938638 |
| O | 20.84801436 | 15.26203620 | 53.78205945 |
| O | 18.95899062 | 17.04520128 | 48.96880678 |
| O | 20.88393670 | 17.09021854 | 51.42484406 |
| O | 19.06965378 | 15.27578294 | 56.33424430 |
| O | 22.70073472 | 15.11054094 | 50.58412596 |
| O | 24.83200358 | 17.12491130 | 55.42434754 |
| O | 22.74654959 | 17.13035474 | 53.03566712 |
| O | 24.84164112 | 15.22948261 | 53.76951343 |
| O | 22.53769568 | 16.99912166 | 48.99433432 |
| O | 24.65820315 | 16.92510375 | 51.47795471 |
| O | 22.87064165 | 15.28321550 | 56.24201669 |
| O | 13.44529460 | 21.00235061 | 55.54861249 |
| O | 13.18186620 | 19.13075100 | 53.87862390 |
| O | 13.38043742 | 21.06230680 | 51.59021594 |
| O | 15.17093750 | 18.99969305 | 50.61917814 |
| O | 17.21837387 | 20.98653787 | 55.35644372 |
| O | 15.35398394 | 20.91034957 | 53.06950235 |
| O | 17.22882821 | 19.07547403 | 57.85381043 |
| O | 17.18964683 | 19.05274980 | 53.82930739 |
| O | 15.00043893 | 20.86588613 | 49.02543943 |
| O | 17.15602215 | 20.88768909 | 51.38013027 |
| O | 15.28499275 | 19.03992507 | 56.31773952 |
| O | 19.03515552 | 18.97358334 | 50.49554109 |
| O | 21.02622516 | 20.90825405 | 55.29142368 |
| O | 19.07792173 | 20.88939748 | 52.90420873 |
| O | 21.01269967 | 19.06670027 | 57.79242272 |
| O | 20.88676157 | 19.00914818 | 53.77876860 |
| O | 19.00380643 | 20.85578083 | 48.88573150 |
| O | 20.97433006 | 20.81680933 | 51.33813296 |
| O | 19.08896322 | 19.08619351 | 56.25597945 |

|    |             |             |             |
|----|-------------|-------------|-------------|
| O  | 22.89575738 | 18.91308691 | 50.50354766 |
| O  | 24.97298034 | 20.82638312 | 55.34036485 |
| O  | 22.85395419 | 20.77982188 | 52.97969249 |
| O  | 25.04130320 | 18.93259310 | 53.66762983 |
| O  | 22.96627303 | 20.77810446 | 48.89708676 |
| O  | 24.77187966 | 20.87209604 | 51.41576397 |
| O  | 22.90715318 | 18.99031149 | 56.21993441 |
| O  | 13.30313867 | 22.80416636 | 53.84836055 |
| O  | 15.33980931 | 22.81367292 | 50.52394309 |
| O  | 17.20703980 | 24.77692641 | 55.21298108 |
| O  | 15.41376970 | 24.90310919 | 52.96385793 |
| O  | 17.30098871 | 23.01337941 | 57.76427430 |
| O  | 17.30264162 | 22.82057269 | 53.68498553 |
| O  | 17.27400405 | 24.83193608 | 51.29411167 |
| O  | 15.36241260 | 22.93172548 | 56.21104908 |
| O  | 19.10400267 | 22.78430447 | 50.43737328 |
| O  | 21.16672187 | 24.67157146 | 55.18738625 |
| O  | 19.14727820 | 25.02556886 | 52.97840561 |
| O  | 21.10802576 | 22.60117054 | 57.67796728 |
| O  | 20.96278302 | 22.73317476 | 53.64029920 |
| O  | 20.94741015 | 24.69232978 | 51.23041194 |
| O  | 19.16655164 | 22.93102729 | 56.14310144 |
| O  | 22.82476091 | 22.70464776 | 50.46866250 |
| O  | 22.83576608 | 24.77206726 | 52.86002071 |
| O  | 24.96658647 | 22.66398992 | 53.62805598 |
| O  | 23.00405513 | 22.76066200 | 56.12137566 |
| O  | 15.36094007 | 17.14566606 | 58.72649964 |
| O  | 17.17542050 | 17.18474920 | 61.22854305 |
| O  | 19.03602397 | 17.78650085 | 62.67462689 |
| O  | 19.07766742 | 17.21827380 | 58.73952478 |
| O  | 20.90003870 | 17.03575066 | 61.15537950 |
| O  | 22.99022739 | 17.15948945 | 58.70459649 |
| O  | 15.21625123 | 19.07926120 | 60.31913796 |
| O  | 16.97781863 | 19.43397998 | 63.53332784 |
| O  | 15.42384977 | 20.99808339 | 58.63273326 |
| O  | 17.15143888 | 21.05715652 | 60.96285714 |
| O  | 19.13364188 | 19.15957729 | 60.24744569 |
| O  | 19.06650950 | 21.16053708 | 62.56106023 |
| O  | 21.05600447 | 19.31762019 | 63.64910227 |
| O  | 19.11294248 | 21.02445497 | 58.63473672 |
| O  | 21.02718459 | 21.14246550 | 61.08028709 |
| O  | 18.72494977 | 19.16407975 | 65.90069903 |
| O  | 22.57359725 | 19.06104615 | 60.24118391 |
| O  | 23.04162872 | 20.88190454 | 58.62390948 |
| Ti | 16.05185233 | 17.23661540 | 44.09883401 |
| Ti | 17.10306041 | 15.14755327 | 46.19194731 |
| Ti | 20.75638851 | 17.00049319 | 43.64974739 |
| Ti | 18.43395550 | 16.58680001 | 41.77581528 |
| Ti | 20.77735288 | 15.03035228 | 46.09758109 |
| Ti | 16.92267790 | 20.84113435 | 43.80217089 |
| Ti | 17.06919224 | 19.05252133 | 46.25319884 |
| Ti | 19.78863713 | 18.11428721 | 39.38323078 |
| Ti | 20.92571415 | 20.67668340 | 43.62536692 |
| Ti | 18.68414279 | 20.45772891 | 41.26046866 |
| Ti | 20.76308691 | 18.93118016 | 46.07816762 |
| Ti | 17.13777334 | 22.91844369 | 46.21612340 |
| Ti | 20.86289244 | 22.82432816 | 46.06753913 |

|    |             |             |             |
|----|-------------|-------------|-------------|
| Ti | 13.41458246 | 13.10212593 | 53.77399044 |
| Ti | 17.20020972 | 13.50432927 | 53.60728337 |
| Ti | 15.24920106 | 13.17591662 | 51.23294680 |
| Ti | 20.89338795 | 13.47448336 | 53.58361003 |
| Ti | 18.95371277 | 12.97675330 | 51.05102721 |
| Ti | 24.87620207 | 13.07798952 | 53.43592259 |
| Ti | 22.68820970 | 13.13419483 | 51.13746750 |
| Ti | 13.12527620 | 17.13657180 | 53.52432161 |
| Ti | 13.21079644 | 15.42190647 | 55.90517899 |
| Ti | 15.05348683 | 15.19473926 | 48.66613260 |
| Ti | 17.03692897 | 17.20792682 | 53.45653999 |
| Ti | 15.30087132 | 17.03336322 | 51.06030733 |
| Ti | 17.15351202 | 15.22283837 | 55.90210329 |
| Ti | 18.96795823 | 15.18770051 | 48.59055961 |
| Ti | 20.76934204 | 17.17506940 | 53.39680217 |
| Ti | 19.03823170 | 16.99109681 | 50.96093009 |
| Ti | 21.03821365 | 15.25882826 | 55.85711952 |
| Ti | 22.83504160 | 15.14231199 | 48.57869635 |
| Ti | 24.52088947 | 17.06807199 | 53.29167881 |
| Ti | 22.82729219 | 16.96538655 | 50.97576244 |
| Ti | 24.90934976 | 15.25103655 | 55.69706604 |
| Ti | 13.59599598 | 20.94911230 | 53.40565168 |
| Ti | 13.07605852 | 19.19164477 | 55.90799629 |
| Ti | 15.08653867 | 18.91926678 | 48.67342738 |
| Ti | 17.26389782 | 20.87735152 | 53.37985872 |
| Ti | 15.17036643 | 20.90889045 | 50.97964532 |
| Ti | 17.18212192 | 19.08289001 | 55.85967720 |
| Ti | 19.01072482 | 18.93321419 | 48.58056206 |
| Ti | 20.92636412 | 20.81536281 | 53.28126939 |
| Ti | 19.03762229 | 20.91622773 | 50.88643099 |
| Ti | 21.06072450 | 19.04741082 | 55.81883092 |
| Ti | 22.88322947 | 18.84688802 | 48.54226482 |
| Ti | 24.63554397 | 20.81540230 | 53.24329496 |
| Ti | 22.95452980 | 20.82457316 | 50.89586785 |
| Ti | 25.17497580 | 18.96827849 | 55.72632960 |
| Ti | 13.24536102 | 24.93061158 | 53.37705961 |
| Ti | 13.43385187 | 22.88095454 | 55.76410841 |
| Ti | 15.10026681 | 22.76790276 | 48.62664127 |
| Ti | 17.27003296 | 24.59507810 | 53.39648997 |
| Ti | 15.38871446 | 24.81307977 | 51.03884413 |
| Ti | 17.25586137 | 22.95527172 | 55.76176952 |
| Ti | 19.07098251 | 22.72110960 | 48.56092249 |
| Ti | 21.00725559 | 24.51127810 | 53.39427679 |
| Ti | 19.13084655 | 25.05390666 | 50.91284674 |
| Ti | 21.18117346 | 22.80662277 | 55.72846595 |
| Ti | 22.96143832 | 22.64690939 | 48.48095064 |
| Ti | 25.04735451 | 24.79057941 | 53.20090251 |
| Ti | 22.82341748 | 24.63753733 | 50.95623178 |
| Ti | 25.04944061 | 22.72879775 | 55.57763906 |
| Ti | 15.36056811 | 15.10239692 | 58.22327230 |
| Ti | 17.18606999 | 17.47987414 | 63.18992877 |
| Ti | 15.17062176 | 17.16636300 | 60.61606401 |
| Ti | 19.16827578 | 15.18479196 | 58.25641568 |
| Ti | 20.83082945 | 17.35044242 | 63.07465602 |
| Ti | 19.00501253 | 17.29005244 | 60.66762238 |
| Ti | 22.86786528 | 15.12018223 | 58.23145123 |
| Ti | 22.89174117 | 17.25958780 | 60.61308419 |

|    |             |             |             |
|----|-------------|-------------|-------------|
| Ti | 15.37503809 | 19.05380941 | 58.19029774 |
| Ti | 17.17167412 | 21.32850939 | 62.77524802 |
| Ti | 15.12937303 | 20.92826505 | 60.45529331 |
| Ti | 16.80088893 | 19.63495163 | 65.41185773 |
| Ti | 19.13468751 | 19.10844344 | 58.21793370 |
| Ti | 20.94978271 | 21.19680892 | 63.00244443 |
| Ti | 19.20041758 | 21.02735568 | 60.57601558 |
| Ti | 20.70828817 | 19.38421313 | 65.53530425 |
| Ti | 22.90071425 | 19.04894779 | 58.12555150 |
| Ti | 23.18145367 | 20.80785716 | 60.62131204 |
| Ti | 15.46051007 | 23.15028362 | 58.18021839 |
| Ti | 19.24604338 | 22.98682114 | 58.07038414 |
| Ti | 22.97788377 | 22.86787853 | 58.12998395 |
| Ti | 18.56312187 | 18.07912705 | 67.50848378 |
